# Supplementary material for: Dynamic Modelling of Pathways to Cellular Senescence Reveals Strategies for Targeted Interventions
Source: PubMed Central journal article supplement (PMC4159174; doi:10.1371/journal.pcbi.1003728), 2014-08-28
Supplement: pcbi.1003728.s025.pdf [file pcbi.1003728.s025.pdf]

*Supporting Information for*

## **Dynamic modelling of pathways to cellular senescence reveals strategies for targeted interventions**

Piero Dalle Pezze<sup>\*,1,2</sup>, Glyn Nelson<sup>\*,1,2</sup>, Gisela Otten<sup>1,2</sup>, Viktor I. Korolchuk<sup>1,2</sup>,  
Thomas B. L. Kirkwood<sup>1,2</sup>, Thomas von Zglinicki<sup>§,1,2</sup>, Daryl P. Shanley<sup>§,1,2</sup>

<sup>1</sup> Institute for Ageing and Health, Newcastle University, Campus for Ageing and Vitality,  
Newcastle upon Tyne, NE4 5PL, United Kingdom

<sup>2</sup> Centre for Integrated Systems Biology of Ageing and Nutrition, Institute for Ageing and Health,  
Newcastle University, Newcastle upon Tyne, United Kingdom

\* these authors contributed equally to this work

§ to whom correspondence should be addressed

DOI: 10.1371/journal.pcbi.1003728

# Table of Contents

Table S1. *In vitro* data set used for estimating the model parameters.

Table S2. Legend of the model variables.

Table S3. ODEs table of the model.

Table S4. Table of the estimated parameters in the model.

Table S5. List of antibodies.

Figure S1. Measures of mitophagy during stress induced senescence.

Figure S2. Mitochondrial mass data as determined by flow cytometry.

Figure S3. Cell viability.

Figure S4. MOTA identifiability matrix for round 1 of parameter estimation.

Figure S5. Correlation plots for round 1 of parameter estimation, as detected by MOTA identifiability analysis.

Figure S6. MOTA identifiability matrix round 2 of parameter estimation.

Figure S7. Correlation plots for round 2 of parameter estimation, as detected by MOTA identifiability analysis.

Figure S8. MOTA identifiability matrix for round 3 of parameter estimation.

Figure S9. Correlation plots for round 3 of parameter estimation, as detected by MOTA identifiability analysis.

Figure S10. MOTA identifiability matrix for round 4 of parameter estimation.

Figure S11. Correlation plots for round 4 of parameter estimation, as detected by MOTA identifiability analysis.

Figure S12. MOTA identifiability matrix for round 5 of parameter estimation.

Figure S13. Correlation plots for round 5 of parameter estimation, as detected by MOTA identifiability analysis.

Figure S14. MOTA identifiability matrix for round 6 of parameter estimation.

Figure S15. Correlation plots for round 6 of parameter estimation, as detected by MOTA identifiability analysis.

Figure S16. MOTA identifiability matrix for round 7 of parameter estimation.

Figure S17. Correlation plots for round 7 of parameter estimation, as detected by MOTA identifiability analysis.

Figure S18. Principal component analysis for the model at each round of parameter estimation.

Figure S19. Simulated tools for model inhibition or over-activation over time.

Figure S20. Inhibition of ROS and mTOR *in vitro*.

Figure S21. Analysis of the two mitochondrial sub-populations upon ROS-mTOR combined intervention.

Figure S22. Analysis of senescence-associated b-galactosidase staining upon upon ROS-mTOR combined intervention.

Figure S23. Additional readouts upon AMPK, FoxO3a or mitophagy simulated over-activation.

Figure S24. Model stochastic simulation showed increase stochasticity over time.

Movie S1. Mitochondrial fusion and fission in young and senescent fibroblasts over 30 minutes time courses [provided as external file].

Model S1. SBML code for the model [provided as external file].

File S1. File collecting all the supporting tables and figures [this file].

#PottersWheel Data Format 3.0.12

# Authors Piero Dalle Pezze, Glyn Nelson, et al. Plos Computational Biology, 2014  
 # Title Dynamic modelling of pathways to cellular senescence reveals strategies for targeted interventions

#Cells Human Diploid Fibroblast MRC5  
 #System A dynamic model for cellular senescence

Input Name Stimulus Type Time points Values  
 Irradiation 1 steps -1;0,0.003472 0;1;0

| Time (days) | Stimulus | FoxO3a_pS253_obs | stdCol-FoxO3a_pS253_obs | FoxO3a_total_obs | stdCol-FoxO3a_total_obs | AMPK_pT172_obs | stdCol-AMPK_pT172_obs | mTOR_pS2448_obs | stdCol-mTOR_pS2448_obs | Akt_pS473_obs | stdCol-Akt_pS473_obs | ROS_obs       | stdCol-ROS_obs | Mito_Mass_obs | stdCol-Mito_Mass_obs | JNK_pT183_obs | stdCol-JNK_pT183_obs | Mitophagy_obs | stdCol-Mitophagy_obs | Mito_Membr_Pot_obs | stdCol-Mito_Membr_Pot_obs | CDKN1A_obs    | stdCol-CDKN1A_obs | CDKN1B_obs    | stdCol-CDKN1B_obs | DNA_damage_gammaH2AX_obs | stdCol-DNA_damage_gammaH2AX_obs | SA_beta_gal_obs | stdCol-SA_beta_gal_obs |        |
|-------------|----------|------------------|-------------------------|------------------|-------------------------|----------------|-----------------------|-----------------|------------------------|---------------|----------------------|---------------|----------------|---------------|----------------------|---------------|----------------------|---------------|----------------------|--------------------|---------------------------|---------------|-------------------|---------------|-------------------|--------------------------|---------------------------------|-----------------|------------------------|--------|
| 0           | 1        | 10               | 1.5                     | 20               | 1.5                     | 10             | 1.5                   | 10              | 1.5                    | 10            | 1.5                  | 10            | 1.5            | 1             | 0.2                  | 10            | 1.5                  | 10            | 8.6551037228         | 12.1290598563      | 4.0327899166              | 10            | 1.5               | 10            | 1                 | 0.3333333335             | 0.81                            | 0.08            |                        |        |
| 0.083       | 1        | NaN              | NaN                     | NaN              | NaN                     | NaN            | NaN                   | NaN             | NaN                    | NaN           | NaN                  | NaN           | NaN            | NaN           | NaN                  | NaN           | NaN                  | NaN           | NaN                  | NaN                | NaN                       | NaN           | NaN               | NaN           | NaN               | NaN                      | 34.1666666665                   | 4.1666666665    | NaN                    | NaN    |
| 0.2         | 1        | NaN              | NaN                     | NaN              | NaN                     | NaN            | NaN                   | NaN             | NaN                    | NaN           | NaN                  | NaN           | NaN            | NaN           | NaN                  | NaN           | NaN                  | NaN           | NaN                  | NaN                | NaN                       | NaN           | NaN               | NaN           | NaN               | NaN                      | NaN                             | NaN             | NaN                    |        |
| 1           | 1        | 7.6051292173     | 4.2854609141            | 39.2316391763    | 32.2920873504           | 7.4299286855   | 3.5125628495          | 12.6271758718   | 4.0284026645           | 10.8656954885 | 2.0741560675         | 13.8978494624 | 0.5820063197   | 1.3927031599  | 1.0907963537         | 11.9173008743 | 2.5252740121         | 10.4597701149 | 17.3948775507        | 10.3697872118      | 2.5031595001              | 21.8450436948 | 3.4503673314      | 15.2258700866 | 5.3307058026      | 26.6666666665            | 5                               | NaN             | NaN                    |        |
| 2           | 1        | NaN              | NaN                     | NaN              | NaN                     | NaN            | NaN                   | NaN             | NaN                    | NaN           | NaN                  | NaN           | NaN            | NaN           | NaN                  | NaN           | NaN                  | NaN           | NaN                  | NaN                | NaN                       | NaN           | NaN               | NaN           | NaN               | NaN                      | 15                              | 1.6666666665    | NaN                    | NaN    |
| 3           | 1        | 6.5099030713     | 1.8938069908            | 27.6423935342    | 15.4717960137           | 4.7184252643   | 3.5017341456          | 13.4504849183   | 3.1134084464           | 4.4939013785  | 1.7887616952         | 18.9516129032 | 1.3026432863   | 2.1918899748  | 1.6754884483         | 13.9014963433 | 1.9808011943         | 5.7285873192  | 4.4824733944         | 14.8814849102      | 4.6600294091              | 28.5611521279 | 3.8372035376      | 39.5729121874 | 16.146629472      | NaN                      | NaN                             | NaN             | NaN                    |        |
| 4           | 1        | NaN              | NaN                     | NaN              | NaN                     | NaN            | NaN                   | NaN             | NaN                    | NaN           | NaN                  | NaN           | NaN            | NaN           | NaN                  | NaN           | NaN                  | NaN           | NaN                  | NaN                | NaN                       | NaN           | NaN               | NaN           | NaN               | NaN                      | NaN                             | 3.8000          | 0.3800                 | 0.3800 |
| 5           | 1        | 14.8220377899    | 2.1707759489            | 14.7437585449    | 10.4614588874           | 1.9298583756   | 0.9276065305          | 14.9468971258   | 4.6233757608           | 6.1639178495  | 2.3586816809         | NaN           | NaN            | NaN           | NaN                  | NaN           | NaN                  | NaN           | NaN                  | NaN                | NaN                       | 27.0965349772 | 3.8046            | 36.8490320641 | 13.1449560672     | NaN                      | NaN                             | NaN             | NaN                    |        |
| 6           | 1        | NaN              | NaN                     | NaN              | NaN                     | NaN            | NaN                   | NaN             | NaN                    | NaN           | NaN                  | NaN           | NaN            | NaN           | NaN                  | NaN           | NaN                  | NaN           | NaN                  | NaN                | NaN                       | NaN           | NaN               | NaN           | NaN               | NaN                      | NaN                             | NaN             | NaN                    | NaN    |
| 7           | 1        | 8.3306439282     | 5.3994079565            | 22.3318579641    | 16.4412180036           | 3.2953463371   | 2.5929777858          | 13.7781529455   | 4.4175193916           | 4.3659008784  | 2.4955525764         | 22.7822580645 | 2.3047450262   | 5.8156255591  | 6.3921910538         | 14.9981700389 | 3.4064833393         | 9.5977011494  | 6.7109895127         | 10.6026353957      | 2.0409958775              | 23.5683053235 | 5.0204128957      | 31.0668025326 | 12.1737700359     | NaN                      | NaN                             | NaN             | NaN                    |        |
| 9           | 1        | 12.5748785742    | 5.20489726              | 11.0990480839    | 13.6019392396           | 2.4131210564   | 1.1690012287          | 13.4408051278   | 5.912776546            | 6.9646191923  | 0.76412538           | NaN           | NaN            | NaN           | NaN                  | NaN           | NaN                  | NaN           | NaN                  | NaN                | NaN                       | 23.9833295216 | 6.3445888278      | 27.8535836209 | 12.8111657449     | NaN                      | NaN                             | 7.8300          | 0.7800                 |        |
| 10          | 1        | 12.9980273021    | 7.1452961323            | 36.3145437733    | 18.4399902938           | 5.7935843656   | 4.4312551186          | 18.4981         | 6.0000                 | 10.0629       | 3.0000               | 25.9139784946 | 2.3047450262   | 11.174251974  | 9.8792836758         | 20.2957757996 | 3.8609924225         | 11.6796       | 10.2458              | 5.1365748778       | 1.8376317107              | NaN           | NaN               | NaN           | NaN               | 8.3333333335             | 1.3333333335                    | NaN             | NaN                    |        |
| 11          | 1        | 14.5298999598    | 7.7874044332            | 9.9389771521     | 9.5877982779            | 3.045945903    | 3.5344772858          | 11.5216726425   | 7.2228536382           | 8.9201124714  | 3.9899833929         | NaN           | NaN            | NaN           | NaN                  | NaN           | NaN                  | NaN           | NaN                  | NaN                | NaN                       | 19.8861322223 | 4.6742930842      | 26.3432368713 | 13.6764548531     | NaN                      | NaN                             | NaN             | NaN                    |        |
| 14          | 1        | 13.0403515424    | 8.4017879515            | 36.4426737868    | 19.8820807355           | 7.1524528652   | 4.7840091159          | 5.7465610995    | 5.9817410567           | 7.057594435   | 3.7150755509         | 24.6639784946 | 2.0476113755   | 9.9659566426  | 7.2238024751         | 19.2572896917 | 5.0466172763         | 10.5064655172 | 11.5481074062        | 9.7638089346       | 3.962951911               | 10.85853216   | 3.3768607811      | 12.8123582261 | 13.7521734335     | NaN                      | NaN                             | NaN             | NaN                    |        |
| 15          | 1        | NaN              | NaN                     | NaN              | NaN                     | NaN            | NaN                   | NaN             | NaN                    | NaN           | NaN                  | NaN           | NaN            | NaN           | NaN                  | NaN           | NaN                  | NaN           | NaN                  | NaN                | NaN                       | NaN           | NaN               | NaN           | NaN               | NaN                      | NaN                             | NaN             | 8.8500                 | 0.8800 |
| 17          | 1        | 9.0220735373     | 5.6190902021            | 23.0905637462    | 12.6815445211           | 12.4261872904  | 8.2065719096          | 4.4766288273    | 5.4646008679           | 5.759853554   | 3.2020032139         | 18.6693548387 | 1.8957642974   | 9.0048148296  | 7.2834127954         | 22.080570042  | 4.4765716601         | 15.933412604  | 14.6127695199        | 5.5670329265       | 2.1363920097              | 11.9250575366 | 2.4583650191      | 17.5323149705 | 19.7521859498     | NaN                      | NaN                             | NaN             | NaN                    |        |
| 20          | 1        | NaN              | NaN                     | NaN              | NaN                     | NaN            | NaN                   | NaN             | NaN                    | NaN           | NaN                  | NaN           | NaN            | NaN           | NaN                  | NaN           | NaN                  | NaN           | NaN                  | NaN                | NaN                       | NaN           | NaN               | NaN           | NaN               | NaN                      | 11.6666666665                   | 1.6666666665    | NaN                    | NaN    |
| 21          | 1        | 9.6231667994     | 5.7630834736            | 14.072964518     | 7.4942588657            | 15.3186493911  | 19.1498281858         | 6.1044537503    | 6.1281958182           | 6.9634711602  | 1.8693922365         | 18.4274193548 | 1.8957642974   | 11.1573001603 | 14.8779874883        | 19.9462264644 | 5.0202392793         | 14.0625       | 13.1679037568        | 4.1905414922       | 3.525643199               | 16.5517496161 | 5.5436326776      | 14.3918505443 | 13.3407502665     | NaN                      | NaN                             | 9.0800          | 0.9000                 |        |

**Table S1. *In vitro* data set used for estimating the model parameters.**

For each model observable, the mean and standard deviation (reported as StdCol) of the quantified *in vitro* intensities are reported. The table is formatted for Potterswheel v. 3.0.12.



| Species            | ODE                                                                                                                                                                                          |
|--------------------|----------------------------------------------------------------------------------------------------------------------------------------------------------------------------------------------|
| Akt                | $dx_1/dt = -k_1 * x_1 * u_1 + k_2 * x_2 * x_6;$                                                                                                                                              |
| Akt_pS473          | $dx_2/dt = k_1 * x_1 * u_1 - k_2 * x_2 * x_6;$                                                                                                                                               |
| AMPK               | $dx_3/dt = -k_3 * x_3 + k_4 * x_4 * x_{21} + k_5 * x_4 * x_{22};$                                                                                                                            |
| AMPK_pT172         | $dx_4/dt = k_3 * x_3 - k_4 * x_4 * x_{21} - k_5 * x_4 * x_{22};$                                                                                                                             |
| mTORC1             | $dx_5/dt = -k_6 * x_5 * u_2 - k_7 * x_5 * u_2 * x_2 + k_8 * x_6 * x_4 - k_{29} * x_5 * u_2 * x_{17};$                                                                                        |
| mTORC1_pS2448      | $dx_6/dt = k_6 * x_5 * u_2 + k_7 * x_5 * u_2 * x_2 - k_8 * x_6 * x_4 + k_{29} * x_5 * u_2 * x_{17};$                                                                                         |
| Mitophagy          | $dx_7/dt = k_9 * x_8 * x_4 - k_{10} * x_7 * x_6;$                                                                                                                                            |
| FoxO3a             | $dx_8/dt = -k_{11} * x_8 * x_2 + k_{12} * x_9 * x_{13} + k_{14} ;$                                                                                                                           |
| FoxO3a_pS253       | $dx_9/dt = k_{11} * x_8 * x_2 - k_{12} * x_9 * x_{13} - k_{13} * x_9 ;$                                                                                                                      |
| CDKN1A             | $dx_{10}/dt = k_{15} * x_{15} * x_8 - k_{16} * x_{10} * x_2;$                                                                                                                                |
| CDKN1B             | $dx_{11}/dt = k_{17} * x_{15} * x_8 - k_{18} * x_{11} * x_2;$                                                                                                                                |
| JNK                | $dx_{12}/dt = -k_{25} * x_{12} * x_{14} + k_{26} * x_{13} ;$                                                                                                                                 |
| JNK_pT183          | $dx_{13}/dt = k_{25} * x_{12} * x_{14} - k_{26} * x_{13} ;$                                                                                                                                  |
| ROS                | $dx_{14}/dt = k_{22} * x_{21} + k_{23} * x_{22} - k_{24} * x_{14} ;$                                                                                                                         |
| DNA_damage         | $dx_{15}/dt = k_{19} * u_3 + k_{21} * x_{14} - k_{20} * x_{15} ;$                                                                                                                            |
| Sen_ass_beta_gal   | $dx_{16}/dt = k_{30} * x_{14} + k_{31} * x_7 - k_{32} * x_{16} ;$                                                                                                                            |
| IKKbeta            | $dx_{17}/dt = k_{27} * x_{14} - k_{28} * x_{17} ;$                                                                                                                                           |
| Mito_mass_new      | $dx_{18}/dt = k_{33} * x_{20} * x_6 + k_{34} * x_{20} * x_6 - k_{35} * x_{18} * x_7 - k_{37} * x_{18} * x_{10};$                                                                             |
| Mito_mass_old      | $dx_{19}/dt = -k_{36} * x_{19} * x_7 + k_{37} * x_{18} * x_{10};$                                                                                                                            |
| Mito_mass_turnover | $dx_{20}/dt = -k_{33} * x_{20} * x_6 - k_{34} * x_{20} * x_6 + k_{35} * x_{18} * x_7 + k_{36} * x_{19} * x_7;$                                                                               |
| Mito_membr_pot_new | $dx_{21}/dt = k_{38} * x_{18} - k_{40} * x_{21} ;$                                                                                                                                           |
| Mito_membr_pot_old | $dx_{22}/dt = k_{39} * x_{19} - k_{41} * x_{22} ;$                                                                                                                                           |
| Nil                | $dx_{23}/dt = k_{10} * x_7 * x_6 + k_{13} * x_9 + k_{16} * x_{10} * x_2 + k_{18} * x_{11} * x_2 + k_{20} * x_{15} + k_{24} * x_{14} + k_{40} * x_{21} + k_{41} * x_{22} + k_{28} * x_{17} ;$ |

**Table S3. ODEs table of the model.**

The Ordinary Differential Equations (ODEs) for the 23 species defining the model.

| Code            | Kinetic rate parameter names (min <sup>-1</sup> ) | Parameter Estimation + MOTA Identifiability Analysis |         |         |         |         |         | Final parameter values |           |          |                   |
|-----------------|---------------------------------------------------|------------------------------------------------------|---------|---------|---------|---------|---------|------------------------|-----------|----------|-------------------|
|                 |                                                   | Round 1                                              | Round 2 | Round 3 | Round 4 | Round 5 | Round 6 | Round 7                | Value     | Mean     | StdDev            |
| K <sub>1</sub>  | Akt_S473_phos_by_insulin                          |                                                      | Fixed   |         |         |         |         |                        | 0.5887831 | 0.543759 | 0.112331 (21%)    |
| K <sub>2</sub>  | Akt_pS473_dephos_by_mTORC1_pS2448                 |                                                      | Fixed   |         |         |         |         |                        | 0.1145982 | 0.105865 | 0.0228701 (22%)   |
| K <sub>3</sub>  | AMPK_T172_phos                                    | Fixed                                                |         |         |         |         |         |                        | 0.355184  | 0.352744 | 0.0861044 (24%)   |
| K <sub>4</sub>  | AMPK_pT172_dephos_by_Mito_membr_pot_new           | Fixed                                                |         |         |         |         |         |                        | 0.1177447 | 0.118864 | 0.026474 (22%)    |
| K <sub>5</sub>  | AMPK_pT172_dephos_by_Mito_membr_pot_old           |                                                      |         |         |         |         | Fixed   |                        | 1.00E-06  | 1.00E-06 | 2.83994e-09 (0%)  |
| K <sub>6</sub>  | mTORC1_S2448_phos_by_AA                           |                                                      |         |         |         |         | Fixed   |                        | 1.00E-06  | 1.01E-06 | 3.22739e-08 (3%)  |
| K <sub>7</sub>  | mTORC1_S2448_phos_by_AA_n_Akt_pS473               |                                                      |         |         | Fixed   |         |         |                        | 162.47104 | 162.865  | 1.0544 (1%)       |
| K <sub>8</sub>  | mTORC1_pS2448_dephos_by_AMPK_pT172                |                                                      | Locked  |         |         |         |         |                        | 191.29726 | 227.515  | 303.535 (133%)    |
| K <sub>9</sub>  | mitophagy_activ_by_FoxO3a_n_AMPK_pT172            |                                                      | Locked  |         |         |         |         |                        | 1319.8422 | 414.722  | 660.744 (159%)    |
| K <sub>10</sub> | mitophagy_inactiv_by_mTORC1_pS2448                |                                                      |         |         | Fixed   |         |         |                        | 645.99931 | 646.154  | 3.12507 (0%)      |
| K <sub>11</sub> | FoxO3a_phos_by_Akt_pS473                          |                                                      |         |         | Fixed   |         |         |                        | 6.8351112 | 6.66246  | 0.964865 (14%)    |
| K <sub>12</sub> | FoxO3a_phos_by_JNK_pT183                          |                                                      | Locked  |         |         |         |         |                        | 0.1128776 | 0.080555 | 0.0580678 (72%)   |
| K <sub>13</sub> | FoxO3a_pS253_degrad                               |                                                      |         |         | Fixed   |         |         |                        | 39.406861 | 38.3369  | 5.92801 (15%)     |
| K <sub>14</sub> | FoxO3a_synthesis                                  |                                                      |         |         | Fixed   |         |         |                        | 407.30741 | 396.224  | 61.2515 (15%)     |
| K <sub>15</sub> | CDKN1A_transcr_by_FoxO3a_n_DNA_damage             |                                                      | Fixed   |         |         |         |         |                        | 0.0852182 | 0.087187 | 0.0118295 (14%)   |
| K <sub>16</sub> | CDKN1A_inactiv_by_Akt_pS473                       |                                                      | Fixed   |         |         |         |         |                        | 0.0667971 | 0.068833 | 0.0098177 (14%)   |
| K <sub>17</sub> | CDKN1B_transcr_by_FoxO3a_n_DNA_damage             | Fixed                                                |         |         |         |         |         |                        | 0.0920527 | 0.101189 | 0.0191258 (19%)   |
| K <sub>18</sub> | CDKN1B_inactiv_by_Akt_pS473                       | Fixed                                                |         |         |         |         |         |                        | 0.0596842 | 0.065009 | 0.0138025 (21%)   |
| K <sub>19</sub> | DNA_damaged_by_irradiation                        | Fixed                                                |         |         |         |         |         |                        | 9237.7231 | 9221.75  | 429.016 (5%)      |
| K <sub>20</sub> | DNA_repair                                        | Fixed                                                |         |         |         |         |         |                        | 0.3257248 | 0.346867 | 0.0546136 (16%)   |
| K <sub>21</sub> | DNA_damaged_by_ROS                                |                                                      | Fixed   |         |         |         |         |                        | 0.1188737 | 0.11719  | 0.00543222 (5%)   |
| K <sub>22</sub> | ROS_prod_by_Mito_membr_pot_new                    |                                                      |         |         |         |         | Fixed   |                        | 4.5546479 | 4.54534  | 0.116158 (3%)     |
| K <sub>23</sub> | ROS_prod_by_Mito_membr_pot_old                    |                                                      |         |         |         |         | Fixed   |                        | 772.82949 | 764.215  | 168.217 (22%)     |
| K <sub>24</sub> | ROS_turnover                                      |                                                      |         |         |         |         | Fixed   |                        | 3.2308232 | 3.2238   | 0.0881861 (3%)    |
| K <sub>25</sub> | JNK_activ_by_ROS                                  |                                                      |         |         | Fixed   |         |         |                        | 0.0050233 | 0.005259 | 0.000493719 (9%)  |
| K <sub>26</sub> | JNK_pT183_inactiv                                 |                                                      |         |         | Fixed   |         |         |                        | 0.0718429 | 0.077181 | 0.0106912 (14%)   |
| K <sub>27</sub> | IKKbeta_activ_by_ROS                              | Assumed                                              |         |         |         |         |         |                        | 1         | --       | --                |
| K <sub>28</sub> | IKKbeta_inactiv                                   | Assumed                                              |         |         |         |         |         |                        | 1         | --       | --                |
| K <sub>29</sub> | mTORC1_S2448_phos_by_AA_n_IKKbeta                 |                                                      |         |         |         |         | Fixed   |                        | 1.00E-05  | 1.02E-05 | 4.1327e-07 (4%)   |
| K <sub>30</sub> | sen_ass_beta_gal_inc_by_ROS                       |                                                      | Fixed   |         |         |         |         |                        | 0.070114  | 0.071294 | 0.00759691 (11%)  |
| K <sub>31</sub> | sen_ass_beta_gal_inc_by_Mitophagy                 |                                                      |         |         |         |         | Fixed   |                        | 1.00E-06  | 1.00E-06 | 8.93605e-10 (0%)  |
| K <sub>32</sub> | sen_ass_beta_gal_dec                              |                                                      |         |         | Fixed   |         |         |                        | 0.1548212 | 0.15451  | 0.00368356 (2%)   |
| K <sub>33</sub> | mito_biogenesis_by_mTORC1_pS2448                  |                                                      |         |         | Fixed   |         |         |                        | 0.013362  | 0.013212 | 0.000315478 (2%)  |
| K <sub>34</sub> | mito_biogenesis_by_AMPK_pT172                     |                                                      |         |         |         | Fixed   |         |                        | 5.89E-05  | 6.33E-05 | 1.19869e-05 (19%) |
| K <sub>35</sub> | mitophagy_new                                     |                                                      | Fixed   |         |         |         |         |                        | 0.2246599 | 0.226809 | 0.0366905 (16%)   |
| K <sub>36</sub> | mitophagy_old                                     |                                                      | Fixed   |         |         |         |         |                        | 0.0012261 | 0.00117  | 0.000262438 (22%) |
| K <sub>37</sub> | mito_dysfunction                                  | Fixed                                                |         |         |         |         |         |                        | 0.0270695 | 0.029294 | 0.00462772 (16%)  |
| K <sub>38</sub> | mito_membr_pot_new_inc                            |                                                      |         |         |         | Fixed   |         |                        | 9882.0274 | 7116.93  | 1779.77 (25%)     |
| K <sub>39</sub> | mito_membr_pot_old_inc                            |                                                      |         |         |         |         | Fixed   |                        | 0.0058602 | 0.006128 | 0.0010366 (17%)   |
| K <sub>40</sub> | mito_membr_pot_new_dec                            |                                                      |         |         |         | Fixed   |         |                        | 1094.5842 | 788.741  | 197.282 (25%)     |
| K <sub>41</sub> | mito_membr_pot_old_dec                            |                                                      |         |         |         | Fixed   |         |                        | 0.9549035 | 0.882729 | 0.102384 (12%)    |

**Table S4. Table of the estimated parameters in the model.**

Up to 7 rounds of alternated parameter estimation and MOTA identifiability analysis were computed in order to progressively determine all the kinetic rate constant parameters. The internal round columns include the following labels: Assumed, Fixed and Locked. A parameter was termed assumed when it was assumed a priori, and therefore was not estimated. The only assumed parameters were related to the IKK- $\beta$  dynamics. A parameter was termed fixed when it could be estimated and identified based on MOTA analysis within a confidence of variance lower than 25% or a correlation coefficient lower than 0.9. A parameter  $p$  was termed locked when it was fixed without being completely identifiable according to MOTA analysis. This was done only when 1)  $p$  belonged to a tuple of related parameters and each parameter in this tuple only related to the same parameter tuple (e.g. case for  $k_8$ ,  $k_9$ ), or 2) the other parameters in this tuple were not found to significantly relate with  $p$ , creating a one-way correlation (e.g. case for  $k_{12}$ , see Figure S8). Since these correlations were local and completely confined to the tuple parameters, they did not affect the other unrelated parameters. The parameters in the tuple were only linearly affected. MOTA correlation matrices and plots are provided in Figures S4-S17, and computed from the best 30% of 20,000 fits (see Materials and Methods for more details). For each parameter, the final value, mean, standard deviation and coefficient of variance are reported. Interestingly, parameter estimation reported an extremely low value for the parameter  $k_5$ , suggesting a poor ATP production by dysfunctional mitochondria. Among the three modalities of mTORC1 activation (amino acids only, amino acids + insulin, amino acids + IKK- $\beta$ ; parameters  $k_6$ ,  $k_7$  and  $k_{29}$ , respectively), it was detected that mTORC1 activation was significantly stronger in the presence of insulin. Finally, parameter estimation also suggested that the increase in SA- $\beta$ -gal (see  $k_{30}$ ,  $k_{31}$ ) was largely dependent on ROS rather than mitophagy.

| Antigen       | Supplier | Cat. No.     | Dilution | Western (W), or<br>Immunofluorescence (IF) |
|---------------|----------|--------------|----------|--------------------------------------------|
| mTOR          | NEB      | 2983S        | 1:1000   | W                                          |
| mTOR-S2448    | NEB      | 5536S        | 1:1000   | W                                          |
| FoxO3a        | NEB      | 2497S        | 1:1000   | W                                          |
| FoxO3a-S253   | NEB      | 9466         | 1:1000   | W                                          |
| JNK           | NEB      | 9252S        | 1:1000   | W                                          |
| JNK-T183/Y185 | NEB      | 9255S        | 1:800    | W                                          |
| JNK-T183/Y185 | R+D      | AF1205       | 1 µg/ml  | W                                          |
| CDKN1A        | NEB      | 2946S        | 1:1000   | W                                          |
| CDKN1B        | NEB      | 3686S        | 1:1000   | W                                          |
| γH2A.X        | Upstate  | 05-636       | 1:1000   | IF                                         |
| AMPK          | NEB      | 2532S        | 1:1000   | W                                          |
| AMPK-T172     | NEB      | 2531S        | 1:1000   | W                                          |
| Akt           | NEB      | 4691S        | 1:1000   | W                                          |
| Akt-S473      | NEB      | 4060S        | 1:1000   | W                                          |
| tubulin       | NEB      | 2148S        | 1:1500   | W                                          |
| LC3 clone2G6  | Enzo     | 803-081-C100 | 1:250    | IF                                         |
| COX-IV        | NEB      | 4844S        | 1:125    | IF                                         |

**Table S5. List of antibodies.**

The antibodies used in this study are shown, with their respective catalogue numbers and the dilutions used for the respective staining (western or immunofluorescence).



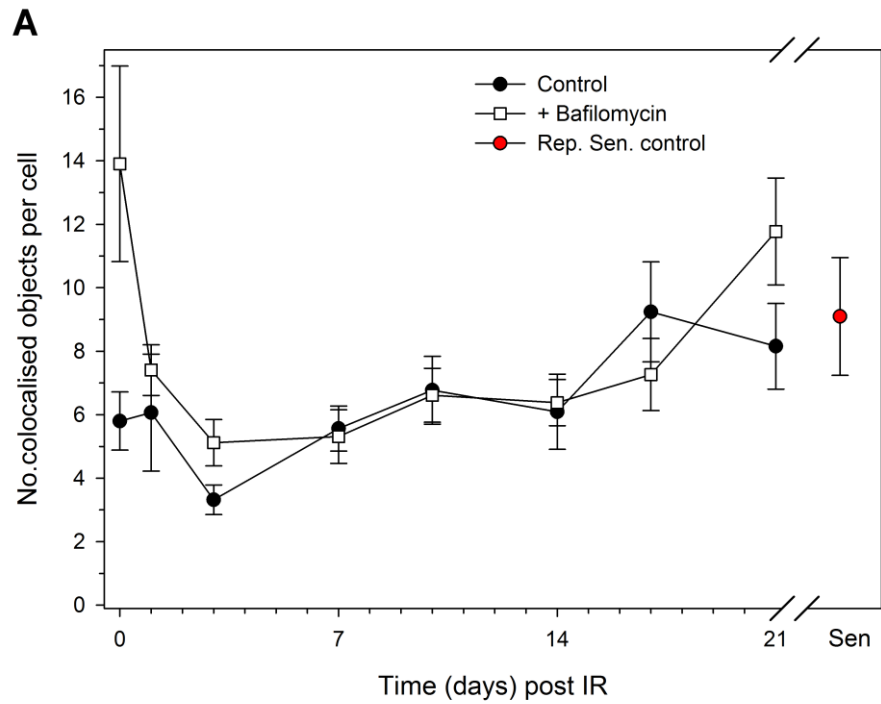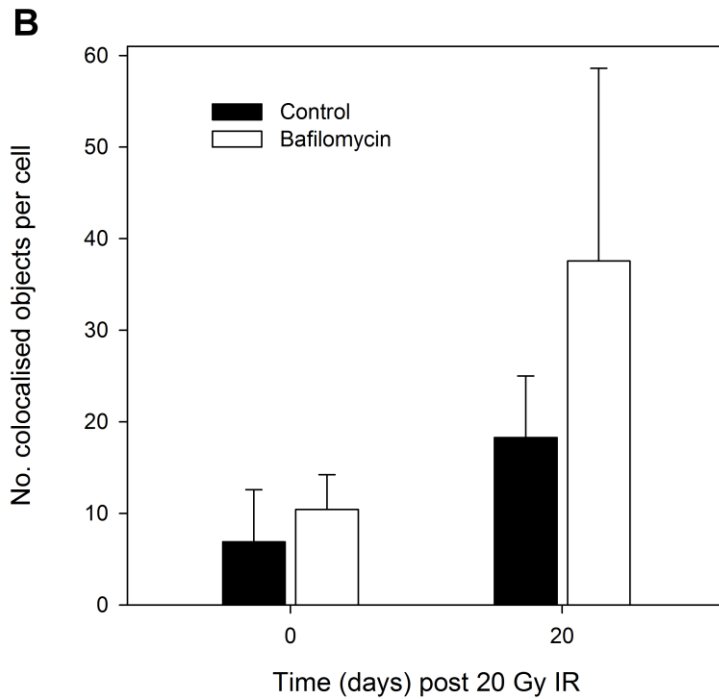

**Figure S1. Measures of mitophagy during stress induced senescence.**

(A) Cells were fixed at the indicated timepoint with or without 1 hour pre treatment with 400 nM Bafilomycin A, and then stained for LC3 and COX-IV. Number of co-localised objects were determined as described in the Methods. Replicatively senescent MRC5 cells were included as a positive control. (B) Live cell microscopy was performed using co-transduction of GFP and RFP targeted lysosome and mitochondrial baculovirus constructs respectively at the timepoints shown. Bafilomycin A treatment and analysis were performed as described for LC3-COX-IV stained cells.

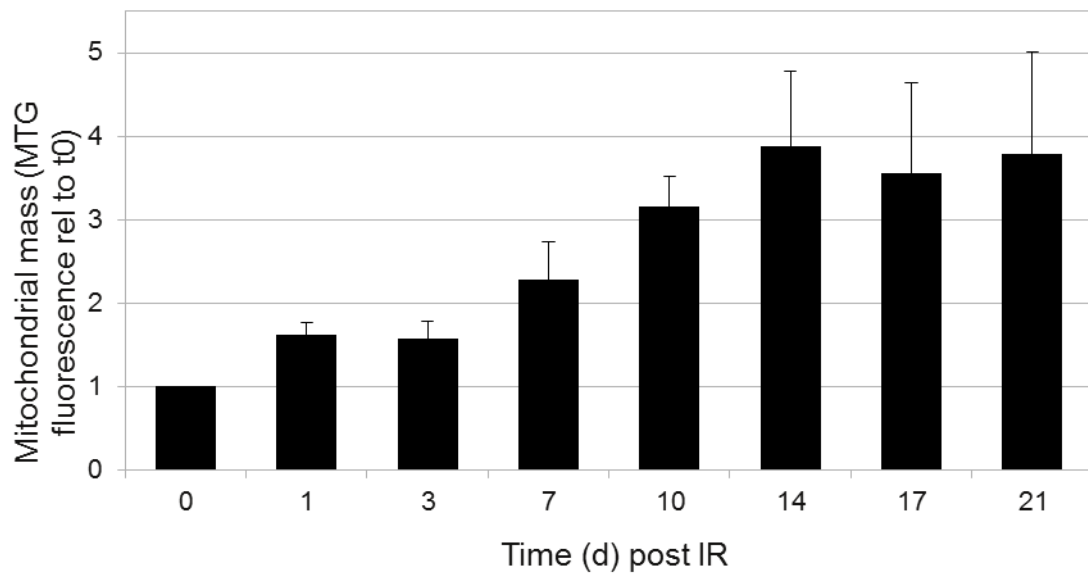

**Figure S2. Mitochondrial mass data as determined by flow cytometry.**

Cells loaded with Mitotracker Green were analysed by flow cytometry at the time points indicated post 20Gy irradiation. Data represent the median fluorescence intensity from 30,000 cells per time point relative to the 0 day control.

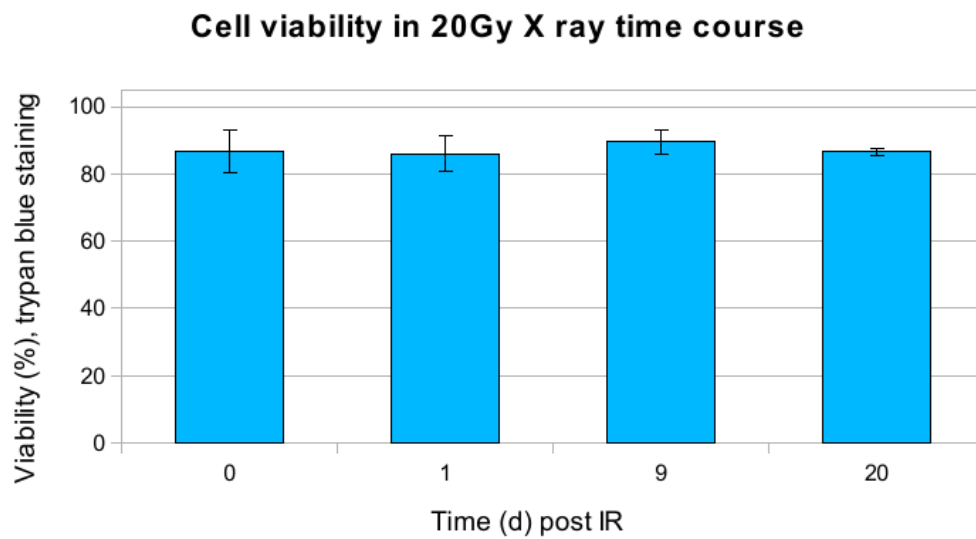

**Figure S3. Cell viability.**

Cell viability was determined from trypsinised cells (plus spent medium) at the indicated time points post 20Gy irradiation by counting live/dead cells using trypan blue and a haemocytometer. A minimum of 120 cells were recorded per dish per time point, 3 dishes per time point. Data are mean  $\pm$  SD. No significant changes in viability were seen over time.

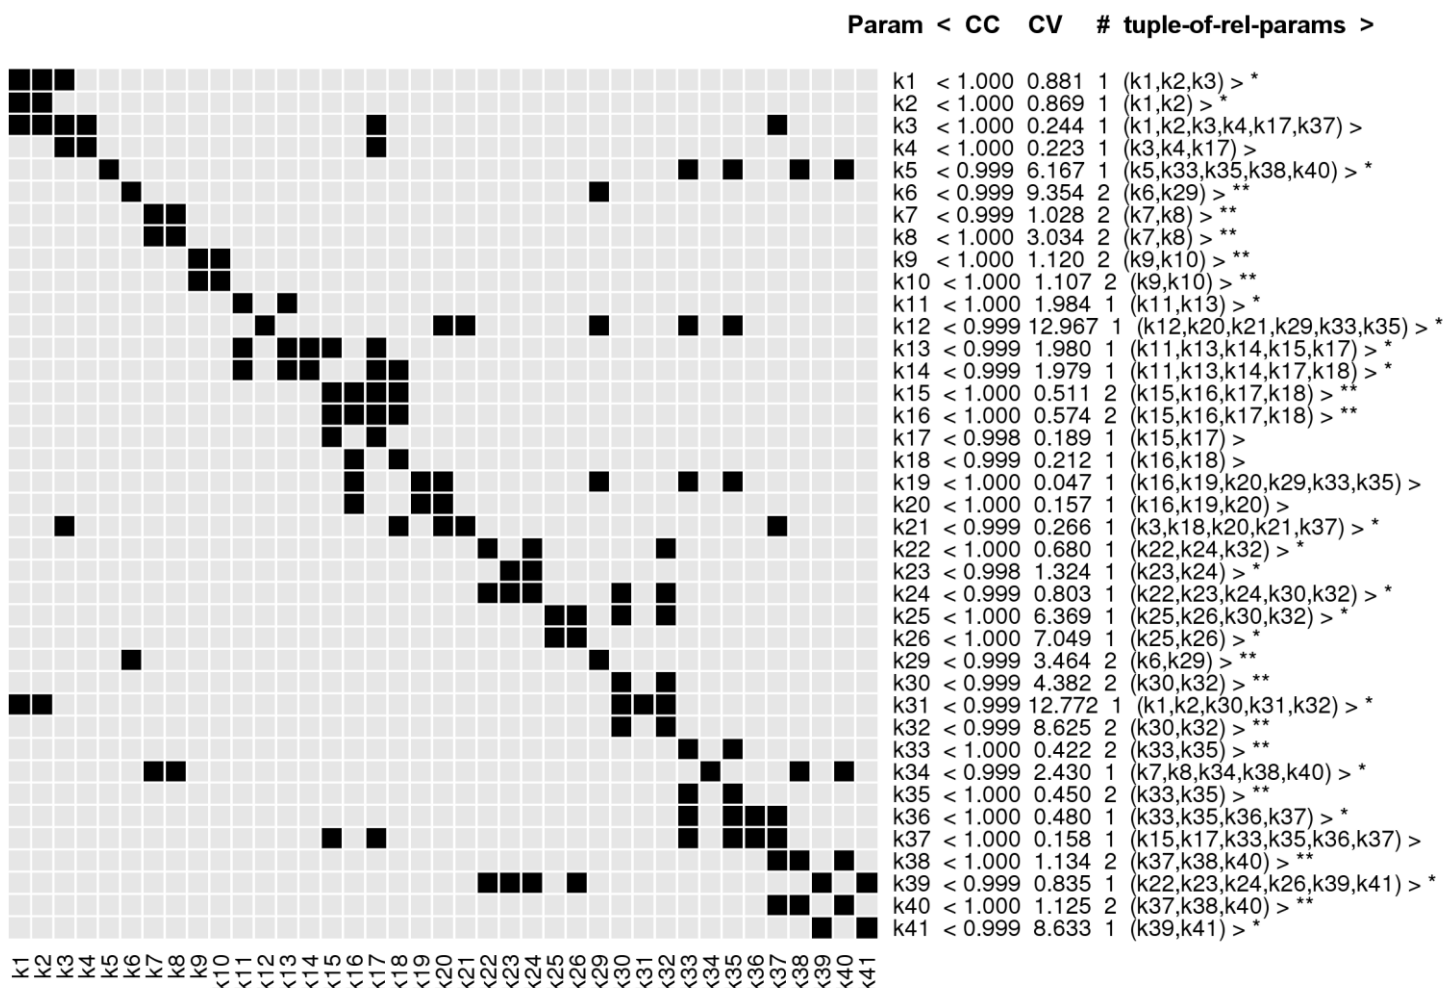

**Figure S4. MOTA identifiability analysis matrix for round 1.**

In this round the kinetic rate constants k3, k4, k17, k18, k19, k20, and k37 were fixed since they were identifiable using MOTA identifiability analysis. \* : Correlation Coefficient (CC) > 0.9 and Coefficient of Variation (CV) > 0.25; \*\* : Correlation Coefficient (CC) > 0.9, Coefficient of Variation (CV) > 0.25 and number of tuples showing this correlation (#) > 1. Format: ParameterCode < CC CV # ("Tuple of related parameters")>.



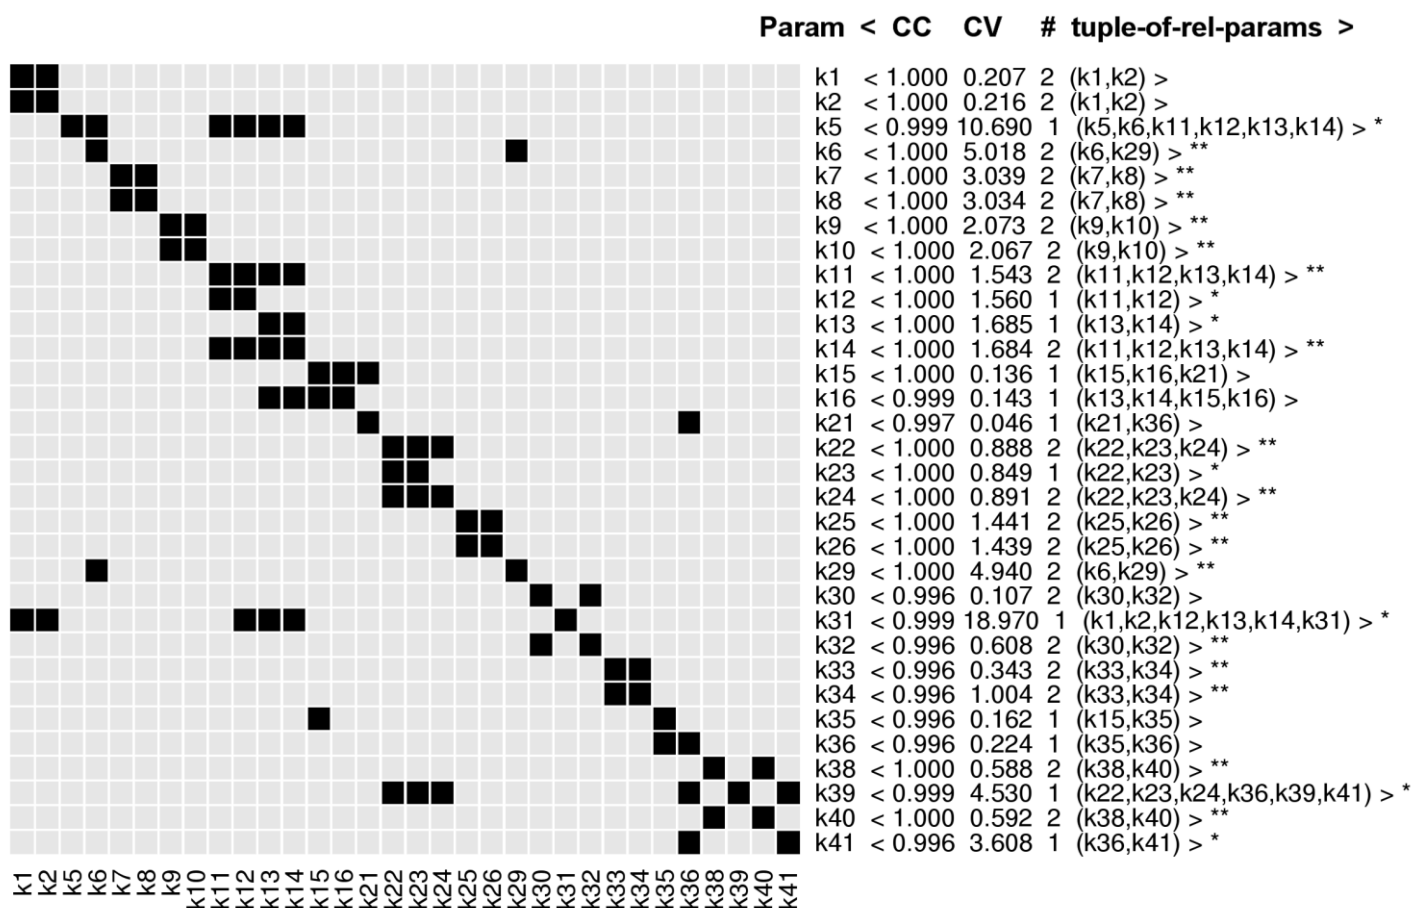

**Figure S6. MOTA identifiability matrix for the round 2 of parameter estimation.**

In this round the kinetic rate constants k1, k2, k15, k16, k21, k30, k35, and k36 were fixed since they were identifiable using MOTA identifiability analysis.

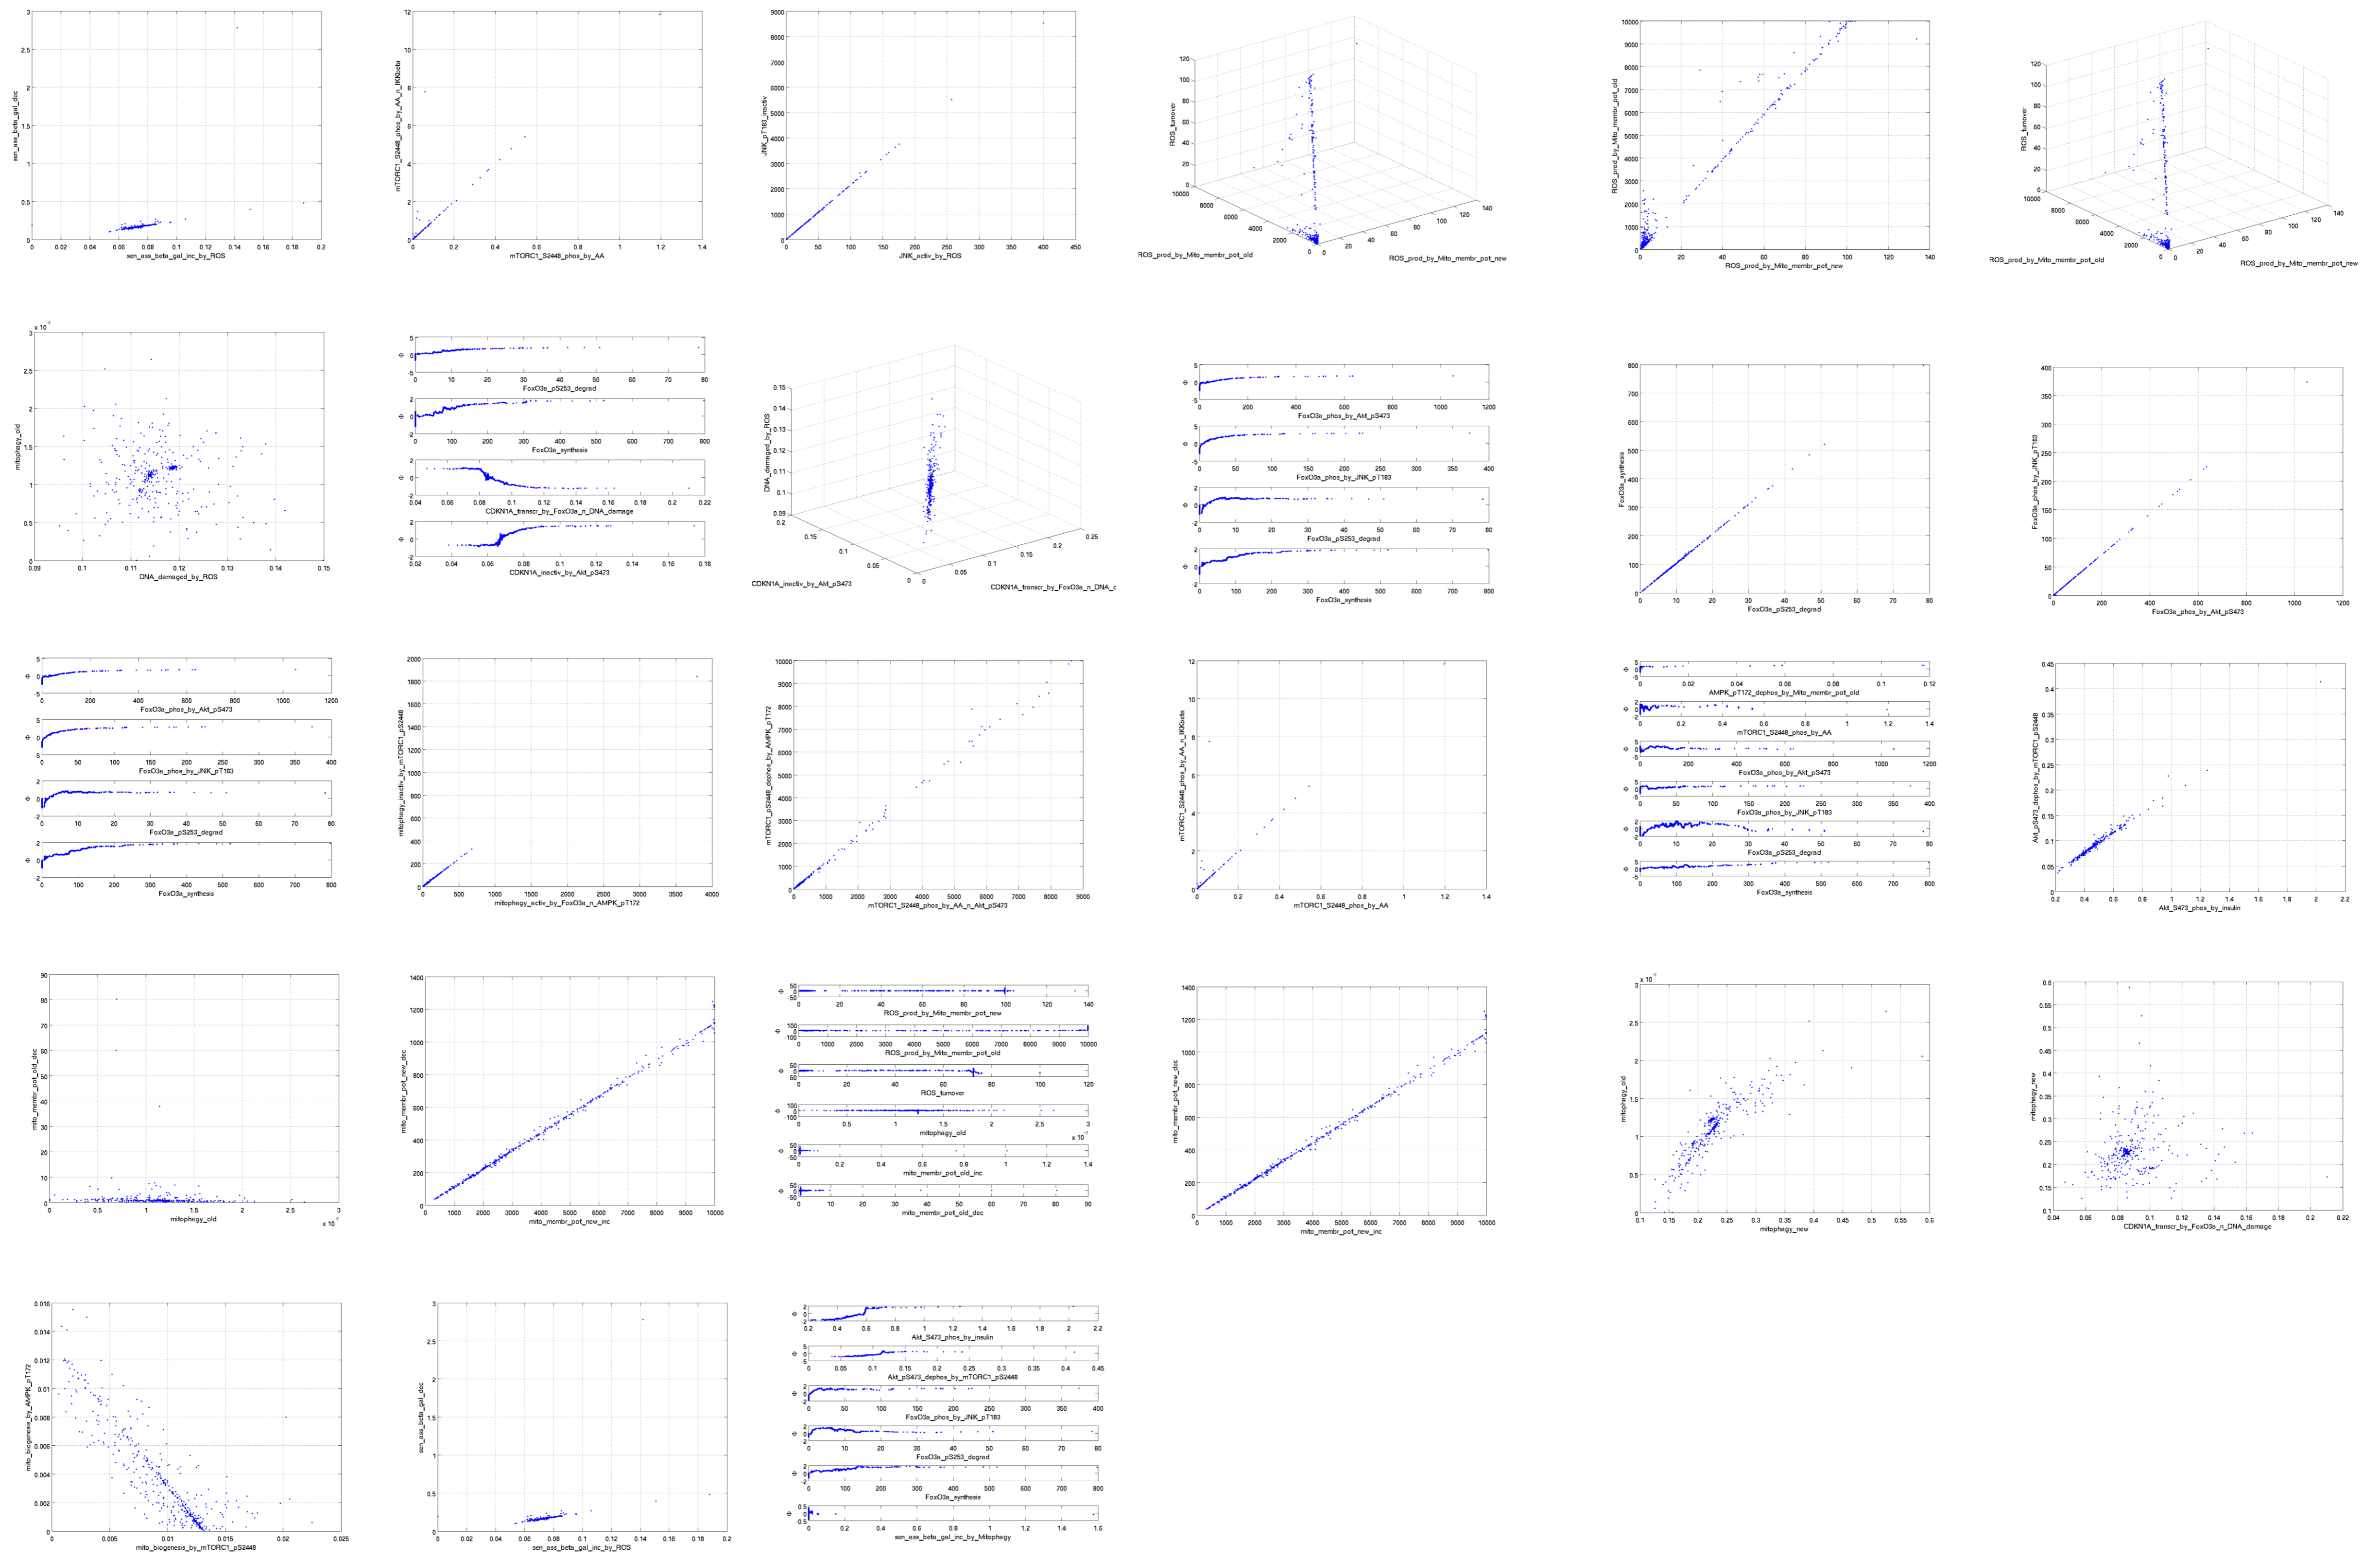

**Figure S7. Correlation plots for the round 2 of parameter estimation, as detected by MOTA identifiability analysis.** Plots for the tuples of related parameters reported in the MOTA identifiability matrix in Figure S6.

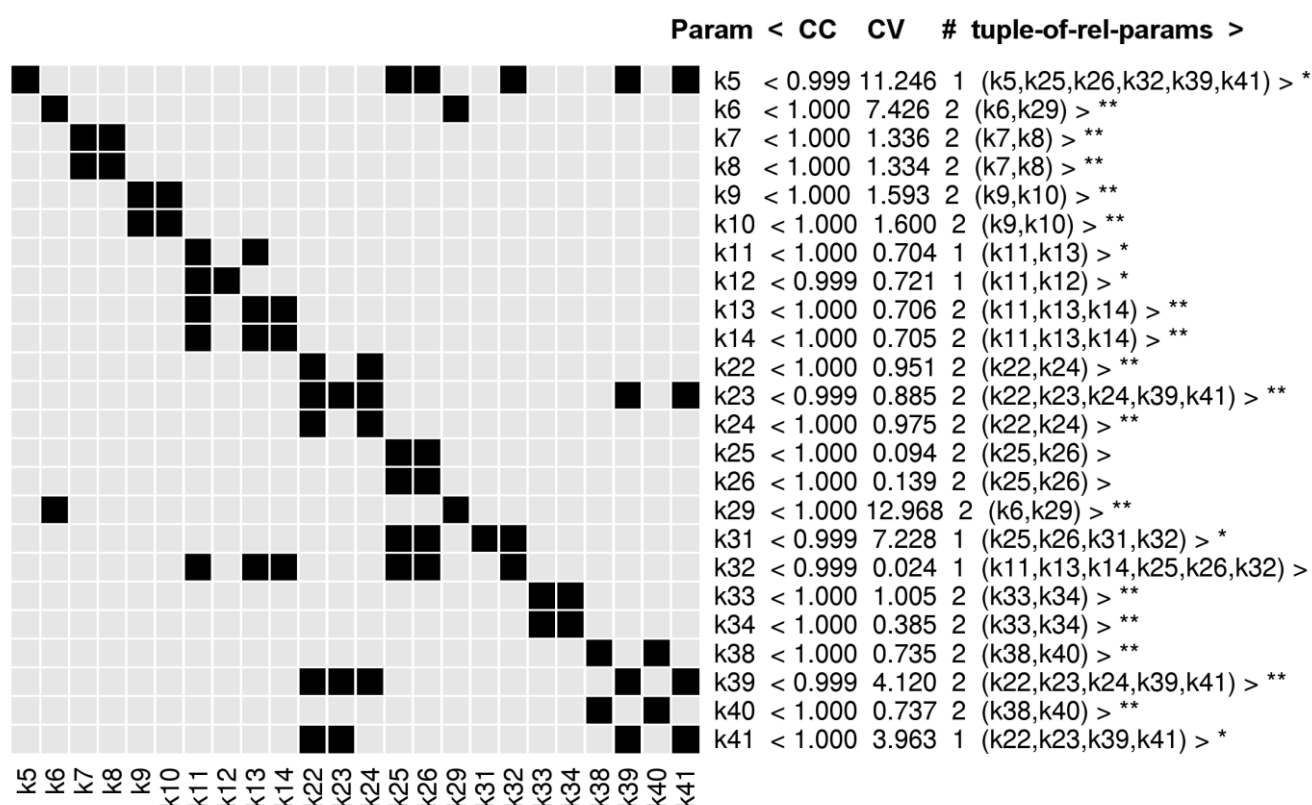

**Figure S8. MOTA identifiability matrix for the round 3 of parameter estimation.**

In this round the kinetic rate constants k25, k26, and k32 were fixed since they were identifiable using MOTA identifiability analysis. The parameters k8, k9, and k12 were locked as reported in Table S4. The parameters k8 and k9 were part of two couples of related parameters. The former k8 with k7, the latter k9 with k10. All these two couples only related internally with themselves and therefore formed two locally defined correlations. The parameter k12 only related with k11, although k11 was not dependent on k12. Hence, this also formed a locally defined correlation.





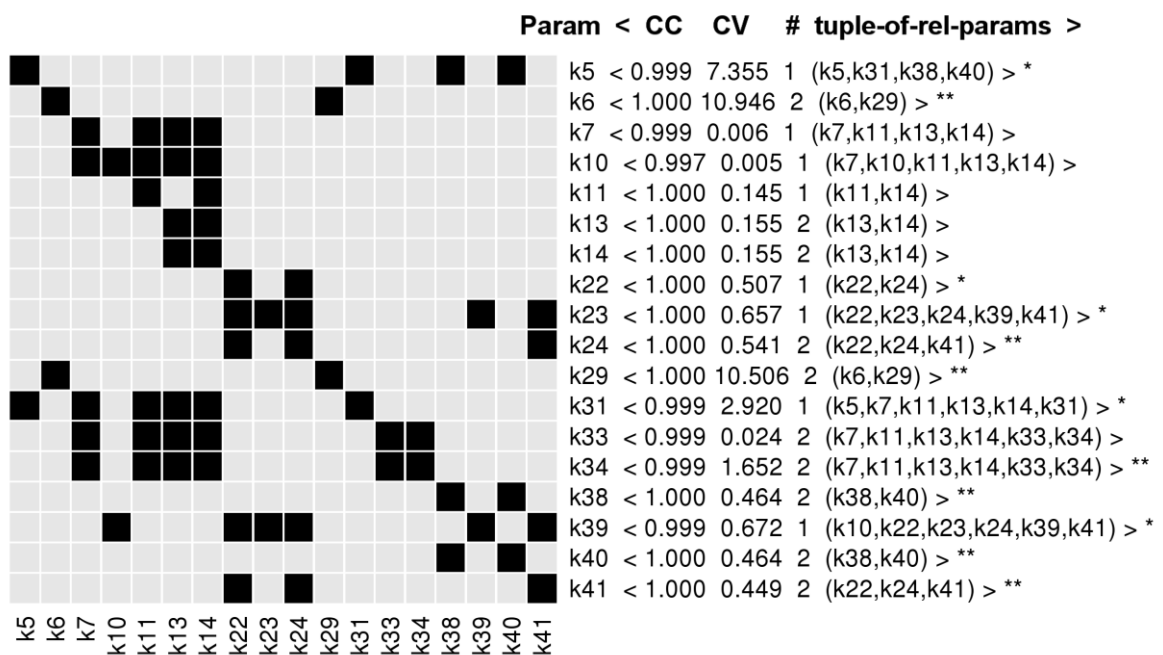

**Figure S10. MOTA identifiability matrix for the round 4 of parameter estimation.**

In this round the kinetic rate constants k7, k10, k11, k13, k14, and k33 were fixed since they were identifiable using MOTA identifiability analysis.

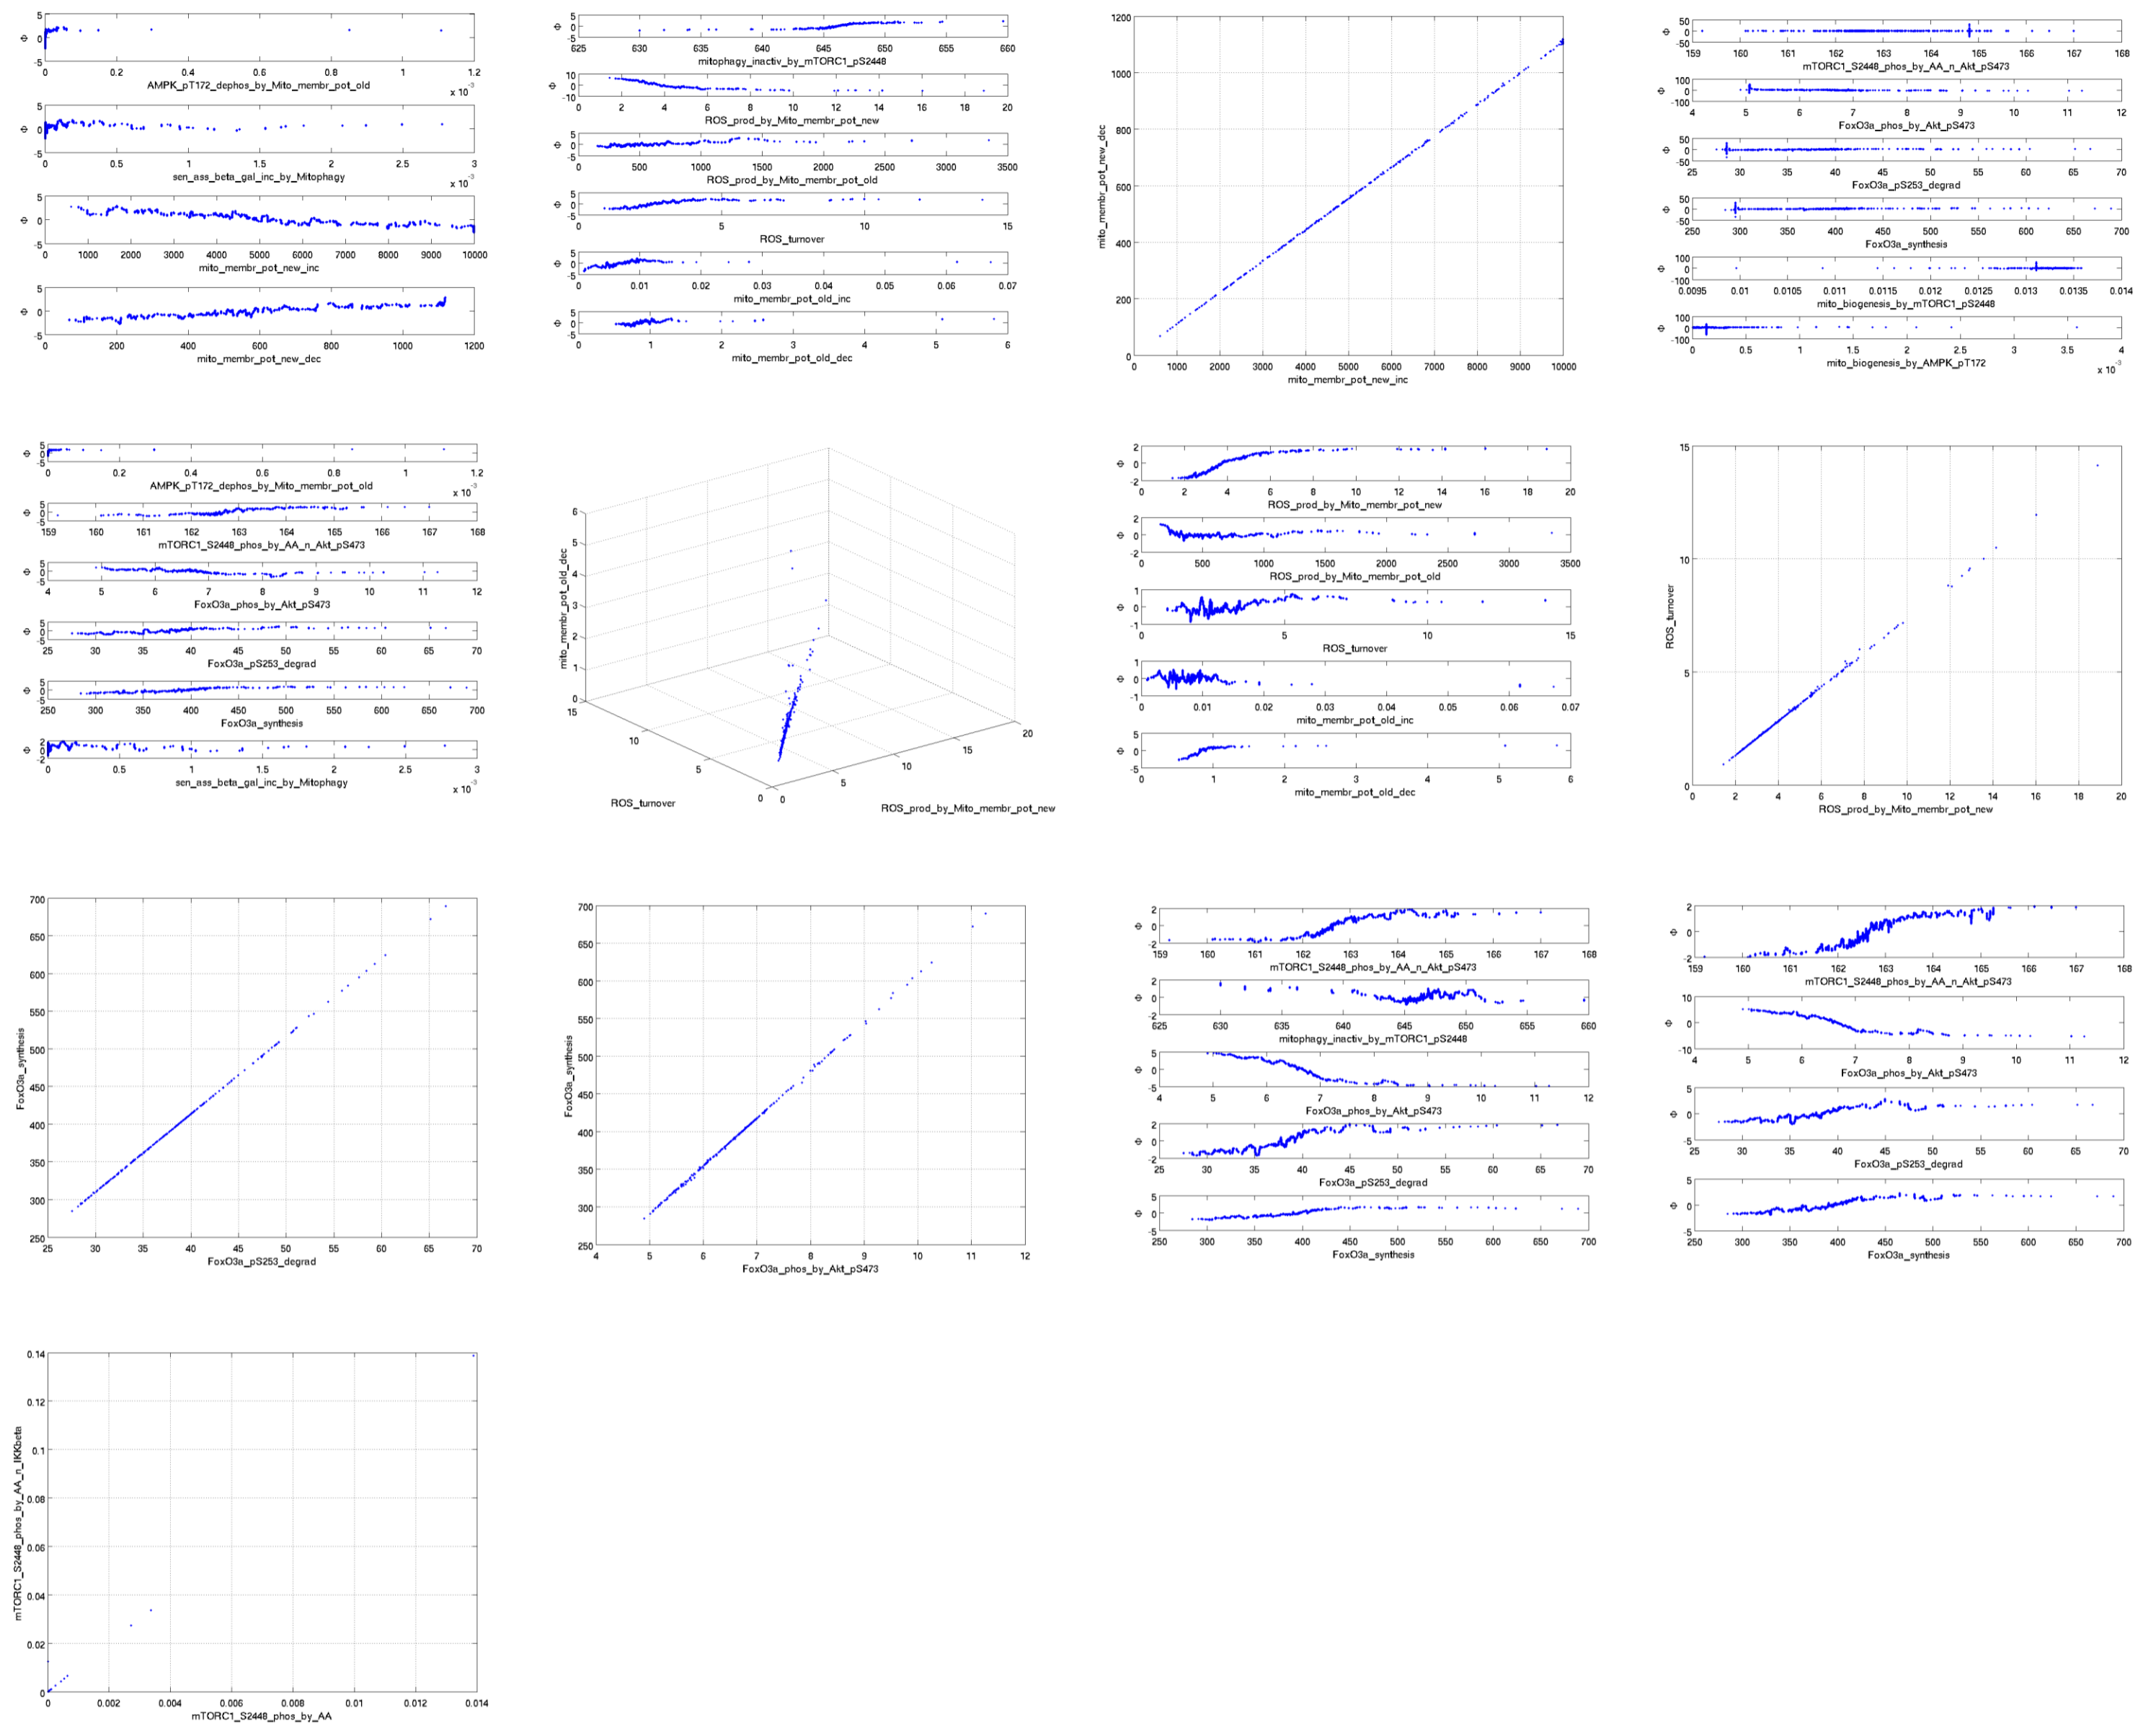

**Figure S11. Correlation plots for the round 4 of parameter estimation, as detected by MOTA identifiability analysis.** Plots for the tuples of related parameters reported in the MOTA identifiability matrix in Figure S10.

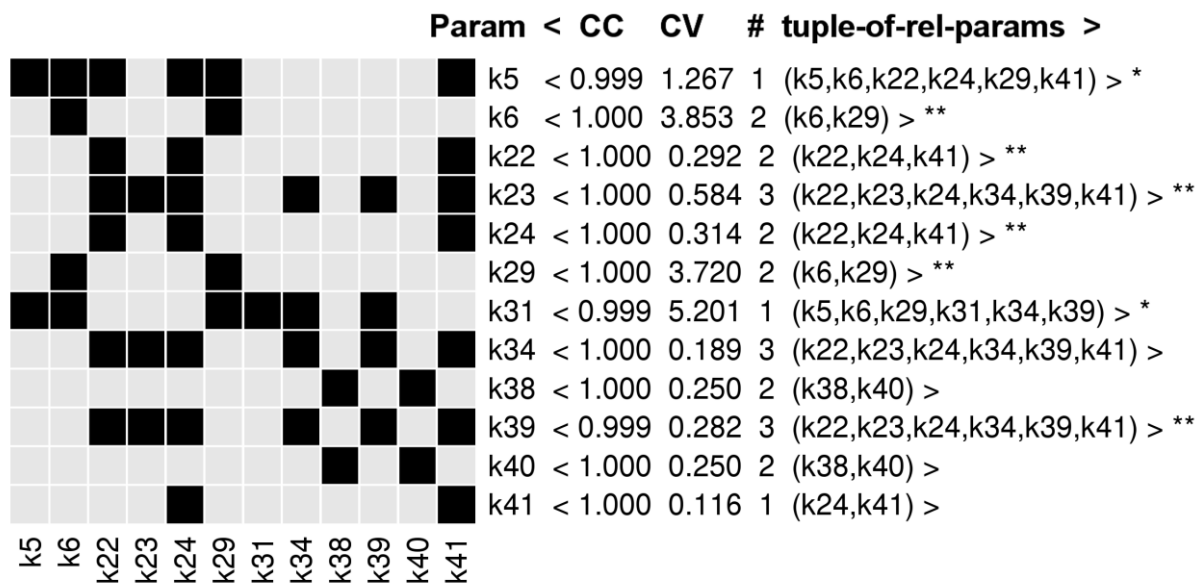

**Figure S12. MOTA identifiability matrix for the round 5 of parameter estimation.**

In this round the kinetic rate constants k34, k38, k40, and k41 were fixed since they were identifiable using MOTA identifiability analysis.

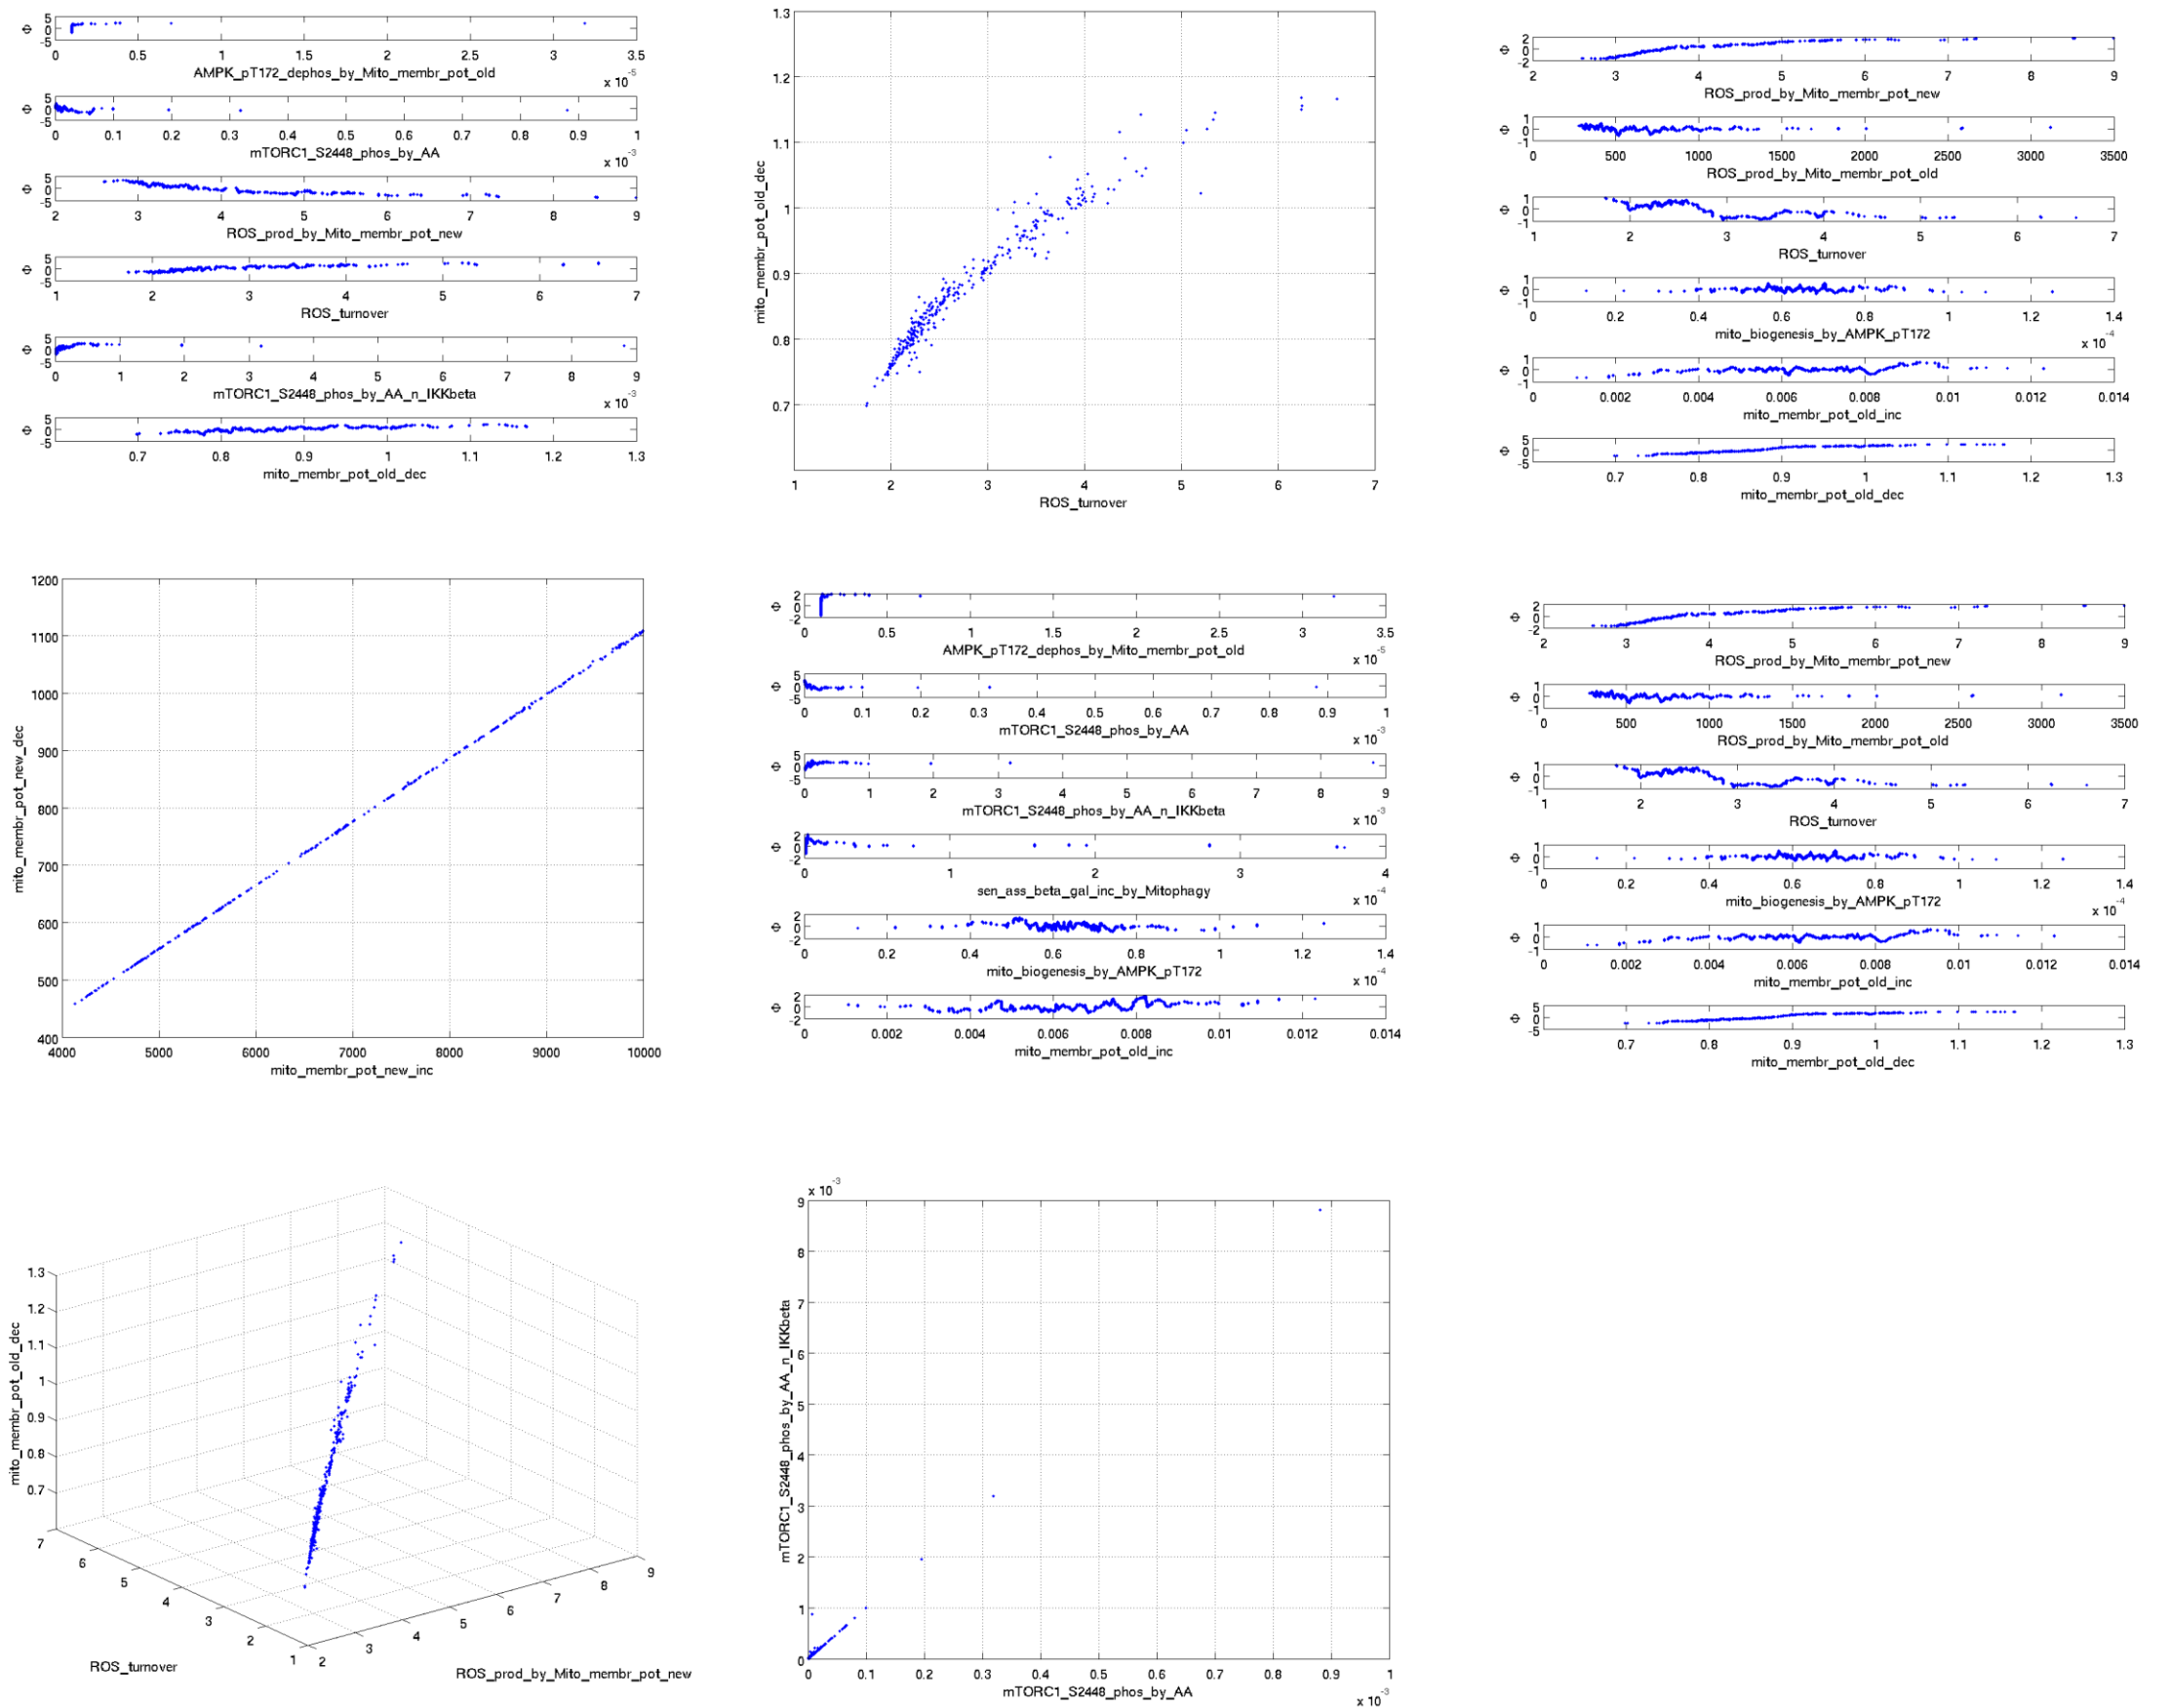

**Figure S13. Correlation plots for the round 5 of parameter estimation, as detected by MOTA identifiability analysis.** Plots for the tuples of related parameters reported in the MOTA identifiability matrix in Figure S12.

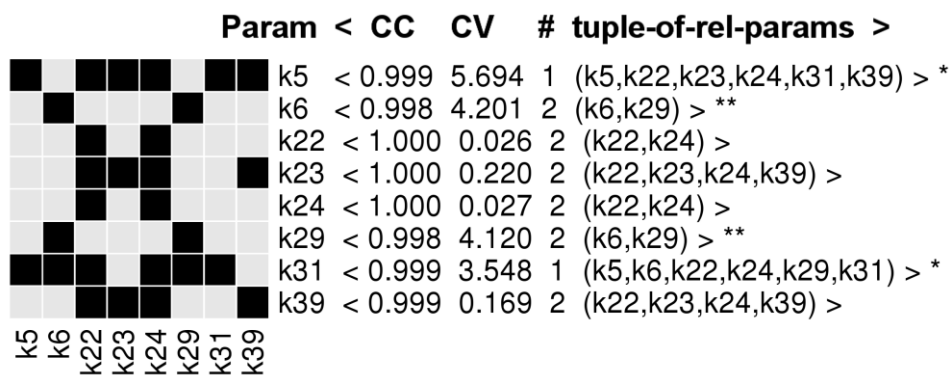

**Figure S14. MOTA identifiability matrix for the round 6 of parameter estimation.**

In this round the kinetic rate constants k22, k23, k24, and k39 were fixed since they were identifiable using MOTA identifiability analysis.

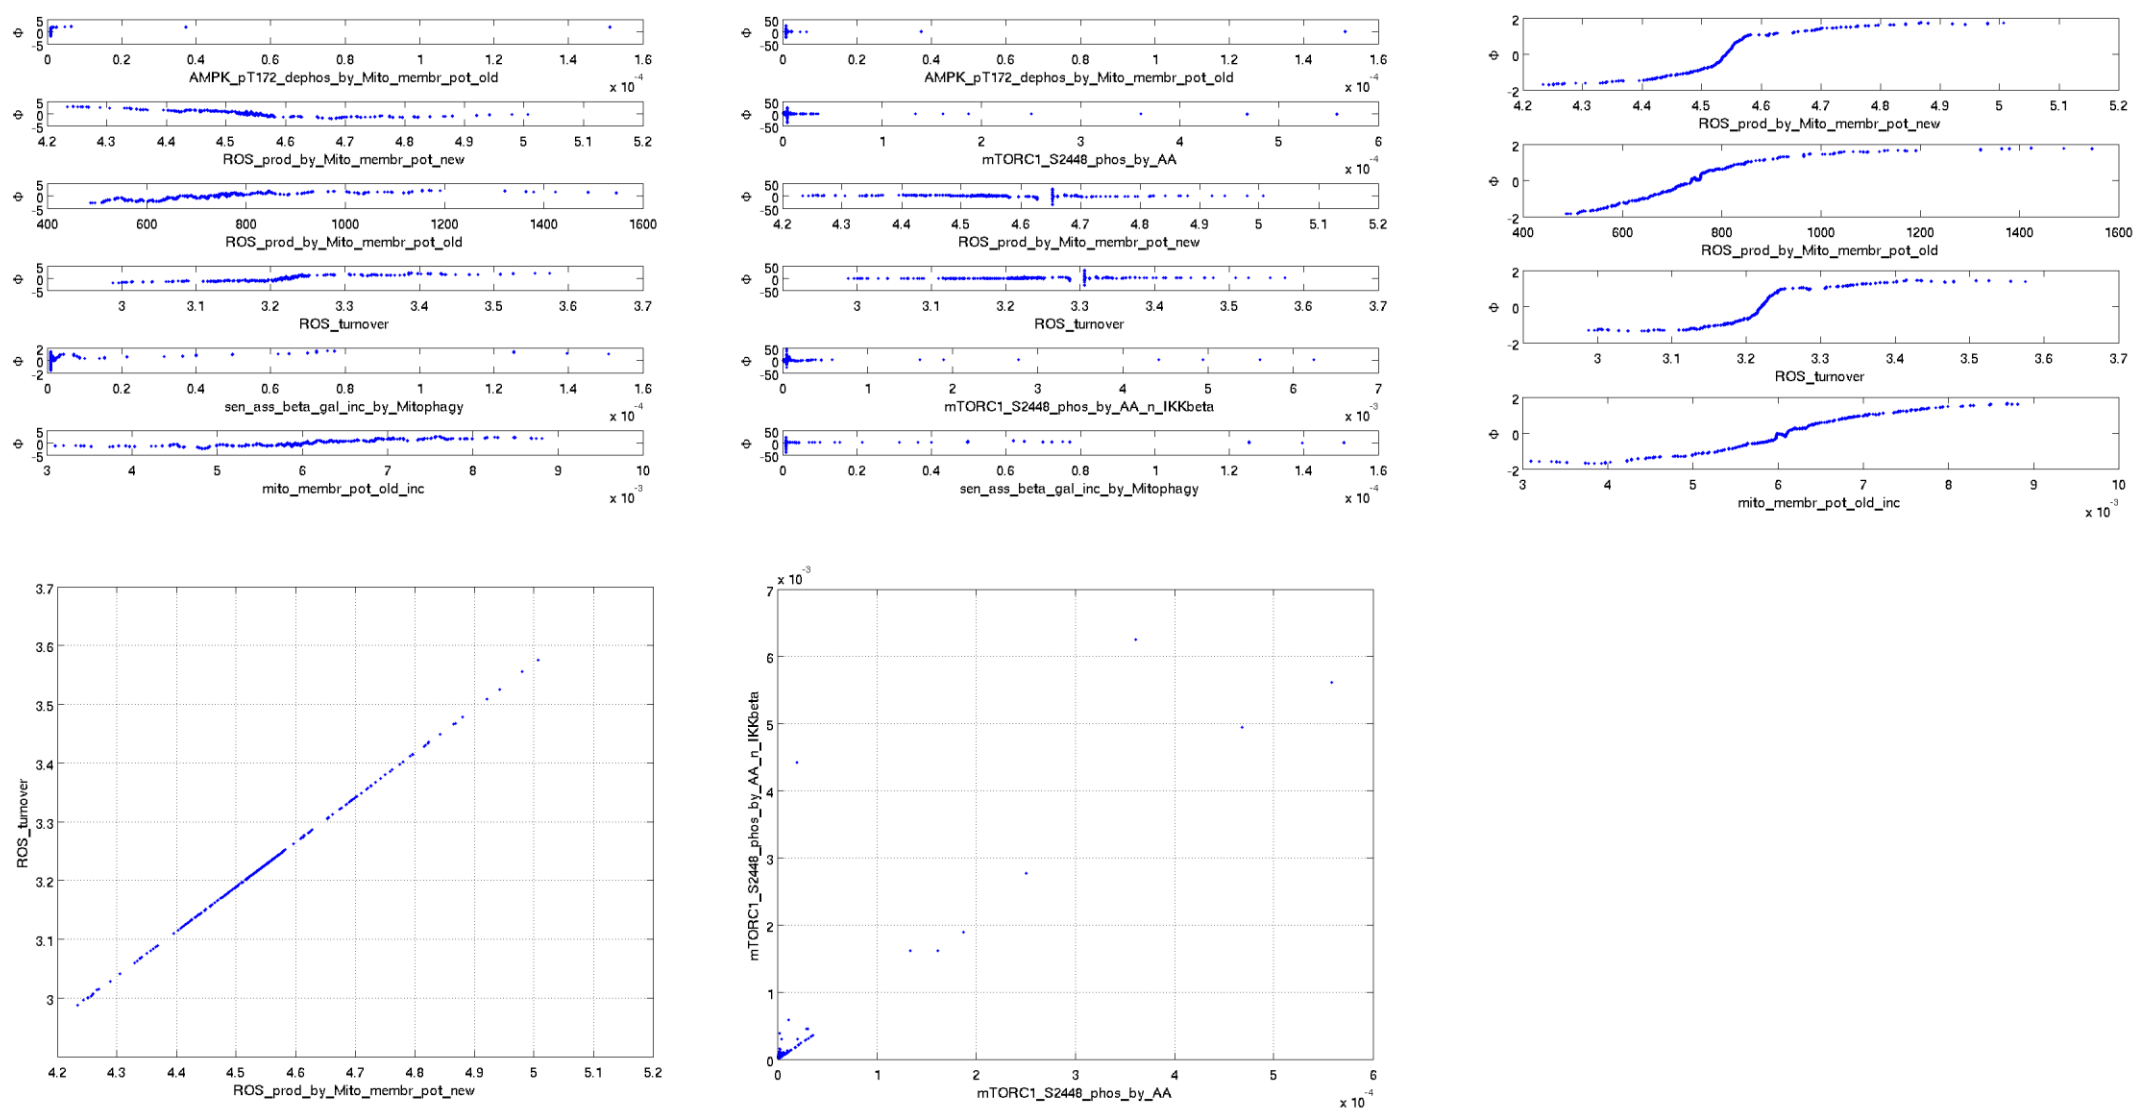

**Figure S15. Correlation plots for the round 6 of parameter estimation, as detected by MOTA identifiability analysis.** Plots for the tuples of related parameters reported in the MOTA identifiability matrix in Figure S14.

|            | Param      | < CC  | CV    | # | tuple-of-rel-params | > |
|------------|------------|-------|-------|---|---------------------|---|
| <b>k5</b>  | <b>k5</b>  | 1.000 | 0.003 | 2 | (k5,k31)            | > |
| <b>k6</b>  | <b>k6</b>  | 1.000 | 0.032 | 2 | (k6,k29)            | > |
| <b>k29</b> | <b>k29</b> | 1.000 | 0.041 | 2 | (k6,k29)            | > |
| <b>k31</b> | <b>k31</b> | 1.000 | 0.001 | 2 | (k5,k31)            | > |

**Figure S16. MOTA identifiability matrix for the round 7 of parameter estimation.**

In this round the kinetic rate constants k5, k6, k29, and k31 were fixed since they were identifiable using MOTA identifiability analysis.



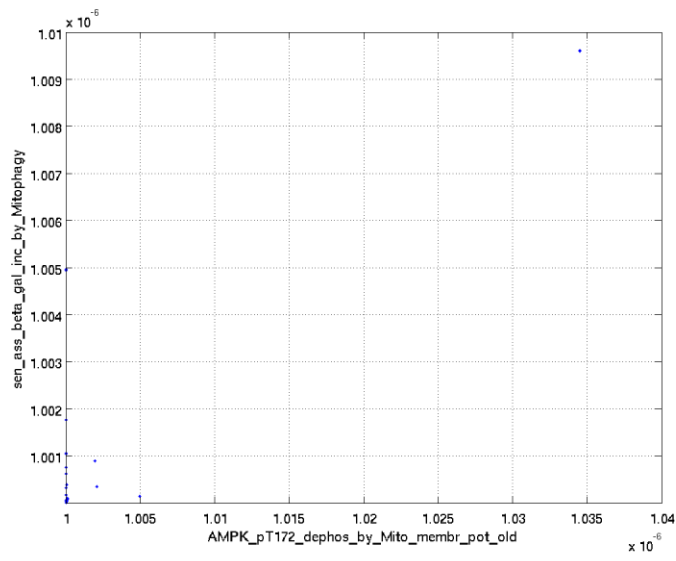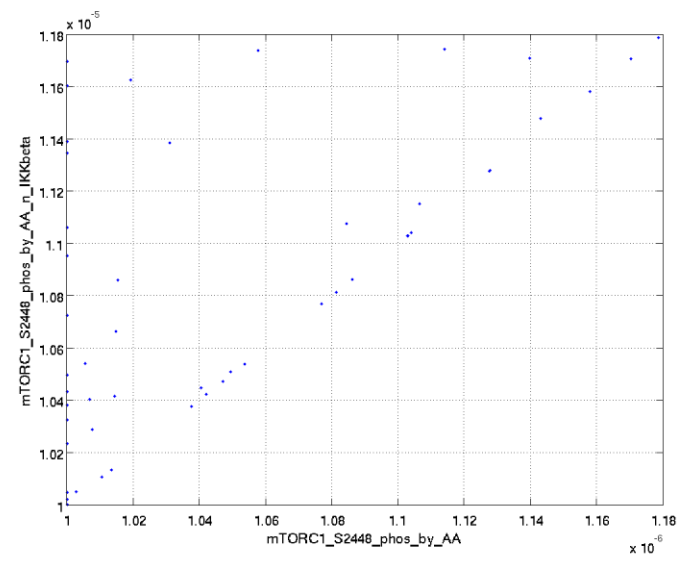

**Figure S17. Correlation plots for the round 7 of parameter estimation, as detected by MOTA identifiability analysis.**  
 Plots for the tuples of related parameters reported in the MOTA identifiability matrix in Figure S16.

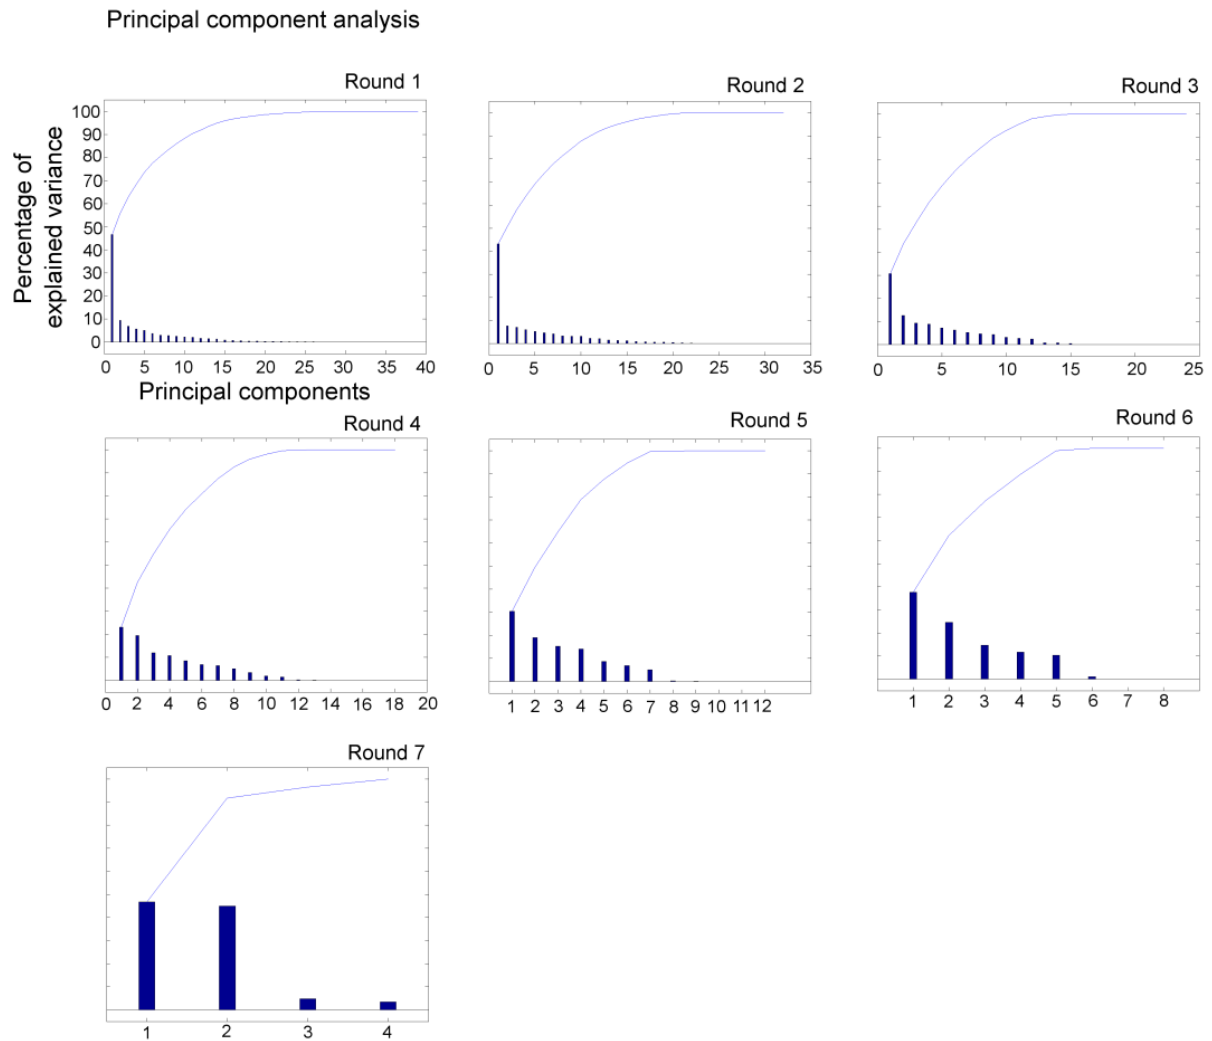

**Figure S18. Principal component analysis for the model at each round of parameter estimation.**

To further investigate the source of variability, principal component analysis (PCA) of the model was computed at each round of parameter estimation. Interestingly, this analysis indicated that only about half of the estimated parameters did not significantly contribute to the overall variance for each round. This suggested that a group of parameters could have been potentially identified at each round.

A

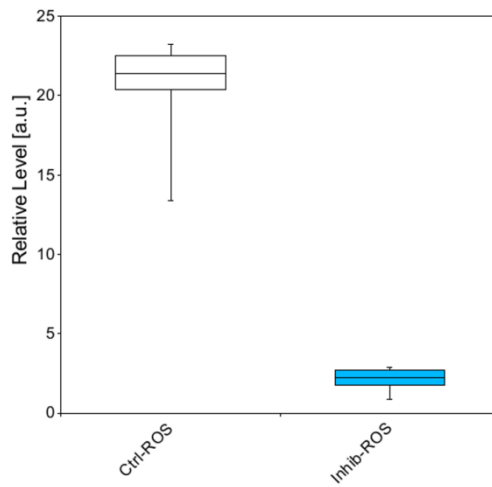

B

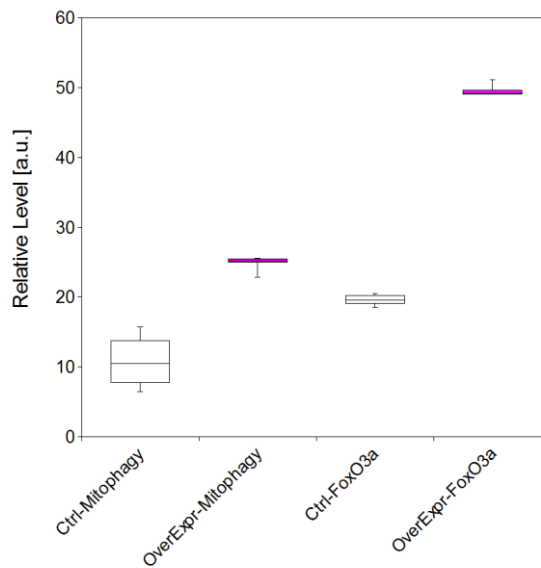

**Figure S19. Simulated tools for model inhibition or over-activation over time.**

(A) To inhibit ROS over time, a simulated ROS inhibitor species was added to the model. This new species reduced ROS levels and acted as an *in vitro* ROS scavenger. The abundance for this species was estimated in order to achieve ROS inhibition to 10% (blue) as compared to the control (white) throughout the time course. (B) In analogy, two new species were created for over-activating mitophagy and FoxO3a, respectively. The abundance for these two species were estimated to achieve a mitophagy or FoxO3a over-activation of 150% (magenta) as compared to the corresponding control (white) throughout the time course. Each boxplot represents the median and two quartiles, whereas the bars indicate the minimum and the maximum values, as estimated from day 1 to day 21.

**A**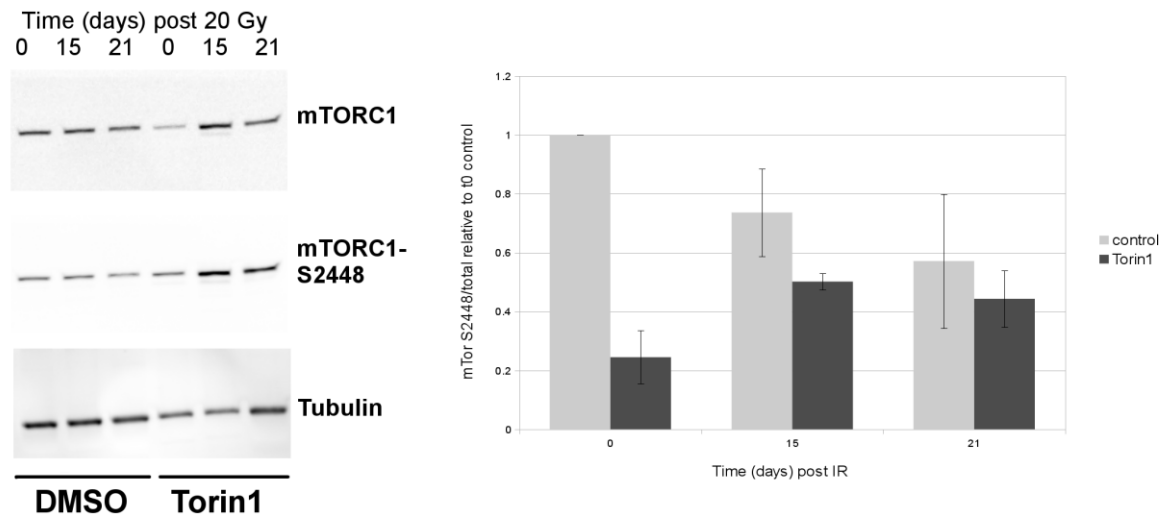**B**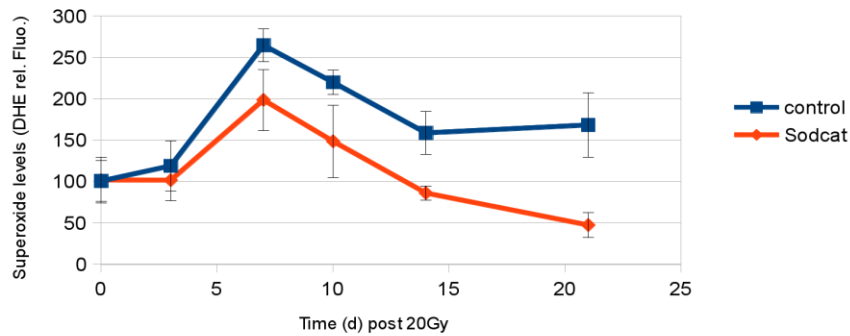**Figure S20. Inhibition of ROS and mTOR *in vitro*.**

Torin and ROS inhibition efficacy. (A) Cells were irradiated with 20Gy X irradiation and then treated with Torin1 or DMSO as described in Methods. Lysates were probed with total mTORC1 and mTORC1-S2448 antibodies. Band intensities were quantified relative to Tubulin loading control and plotted as mean  $\pm$  SD ratios of mTORC1-S2448 to total mTORC1 (3 repeats). (B) Cells were irradiated with 20Gy X irradiation and then treated with SOD and catalase as described in Methods. Cells were stained with DHE to measure intracellular superoxide levels by flow cytometry. Time course data over 21 days are plotted (n=3).

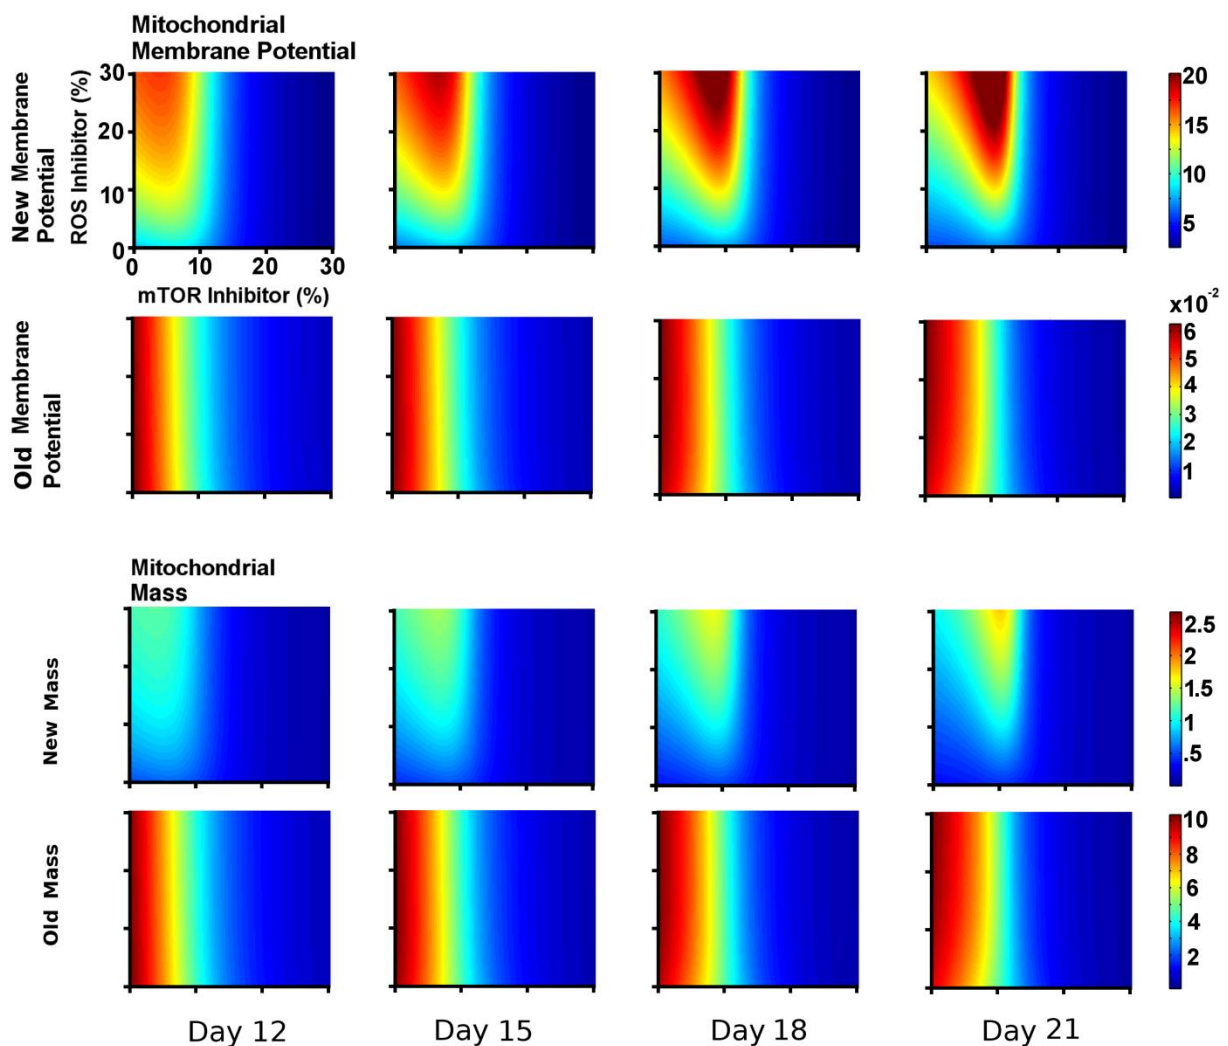

**Figure S21. Analysis of the two mitochondrial sub-populations upon ROS-mTOR combined intervention.** The internal states for the new and old mitochondrial sub-populations were also investigated upon combined ROS-mTOR simulated intervention. Regarding the mitochondrial membrane potential, the global effect of these interventions mainly resulted from changes in the sub-population of new mitochondria, which showed a strong synergistic response at particular levels of mTOR- ROS inhibition. The effect upon old mitochondrial  $\psi_m$  was almost entirely dependent upon mTOR inhibition, but still changed their potential by an insignificant amount compared to the new mitochondrial population. Concerning the mitochondrial mass, the perturbation of combined ROS-mTOR acted predominantly on the young population, although these changes were largely hidden in the overall population (Figure 4A) due to the larger proportion being comprised of the old population. The point (0, 0) indicates the control (no inhibition).

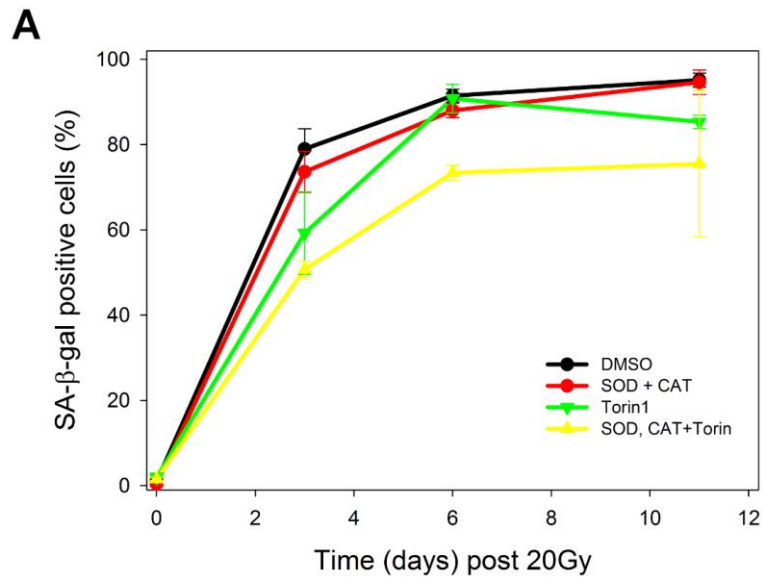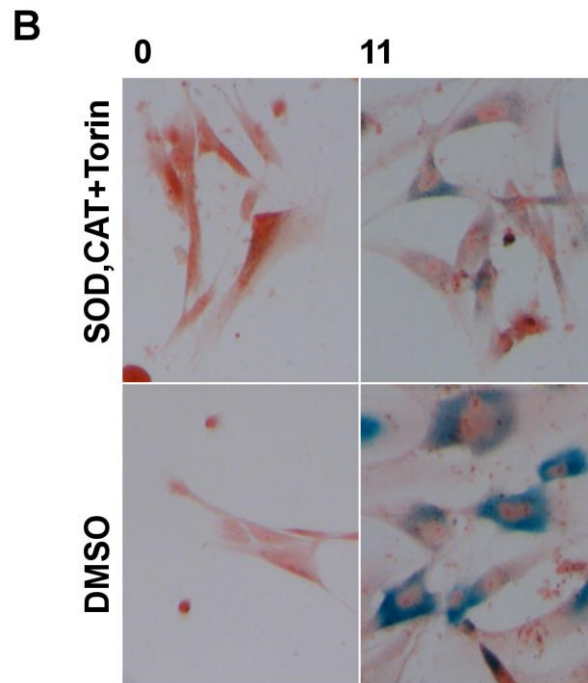

**Figure S22. Analysis of senescence-associated b-galactosidase staining upon upon ROS-mTOR combined intervention.**

(A) Cells were fixed at the indicated timepoints and assayed for senescence-associated b-galactosidase followed by counterstaining with nuclear fast red prior to imaging. An average of ~300 cells were counted per coverslip, with any blue cytoplasmic staining being considered positive. Data are  $n=2 \pm SD$ . Combined intervention produced significantly lower positive cells at 3 and 6 days post irradiation relative to DMSO control ( $P < 0.05$ ). (B) Example images of stained coverslips showing the decreased intensity of staining observed in treated cells.

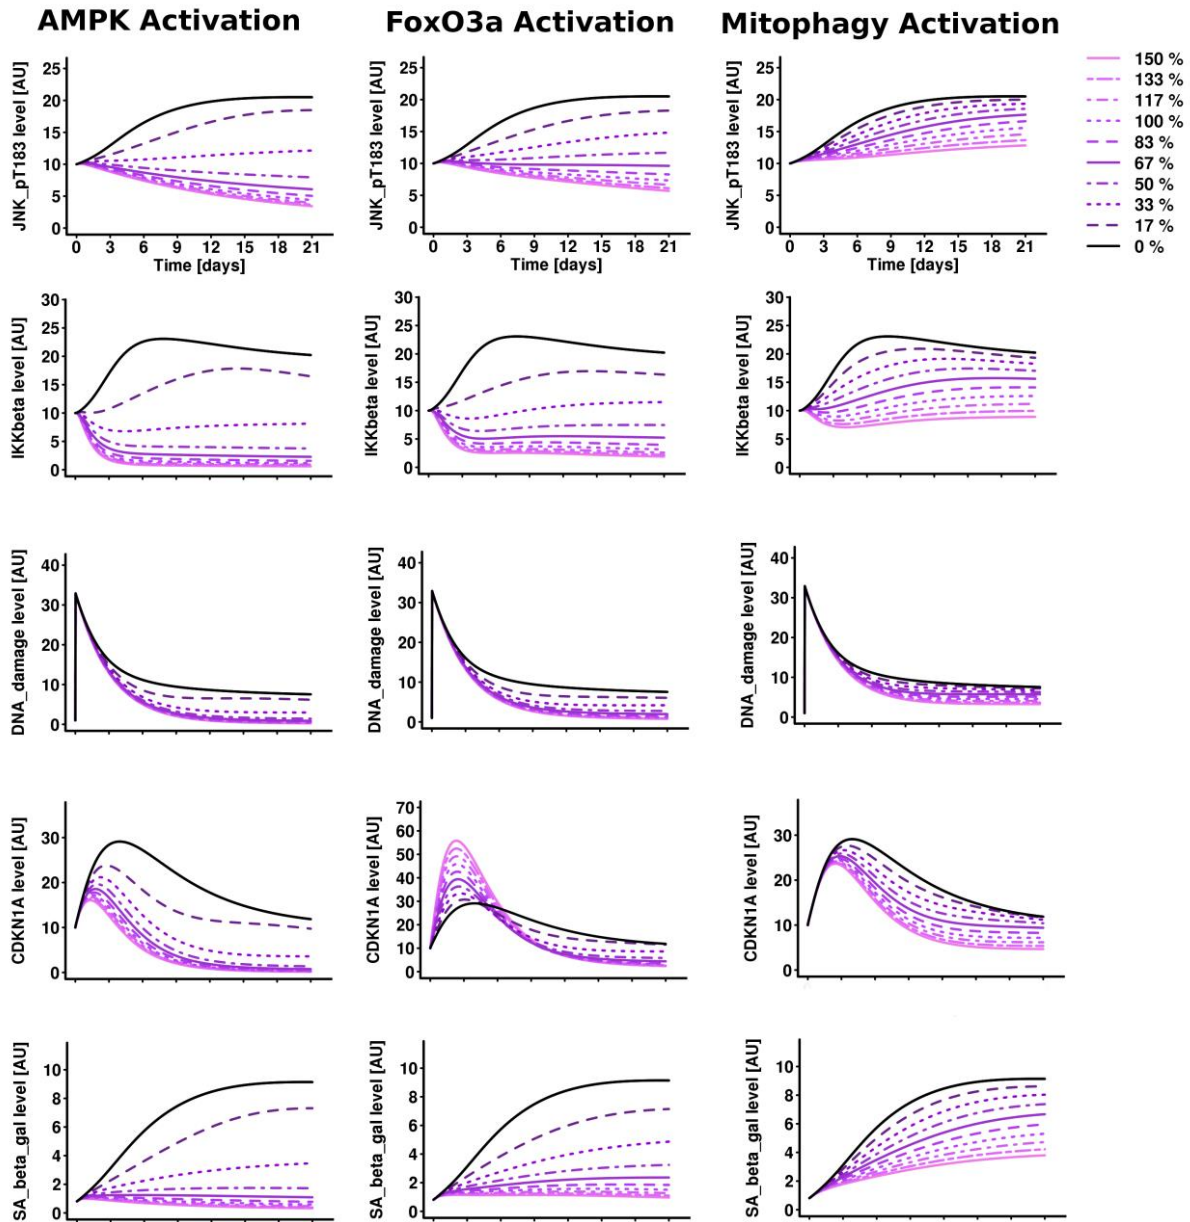

**Figure S23. Additional readouts upon AMPK, FoxO3a or mitophagy simulated over-activation.**

The model predicted a decrease in the DNA damage/oxidative stress response pathways upon over-activation of AMPK, FoxO3a or mitophagy. AMPK was predicted to achieve the strongest inhibition throughout the time course as compared to FoxO3a or mitophagy. Interestingly, an over-activation of FoxO3a was predicted to initially increase and then reduce CDKN1A levels as compared to the control (black line), suggesting differential regulation of cell cycle arrest over time.

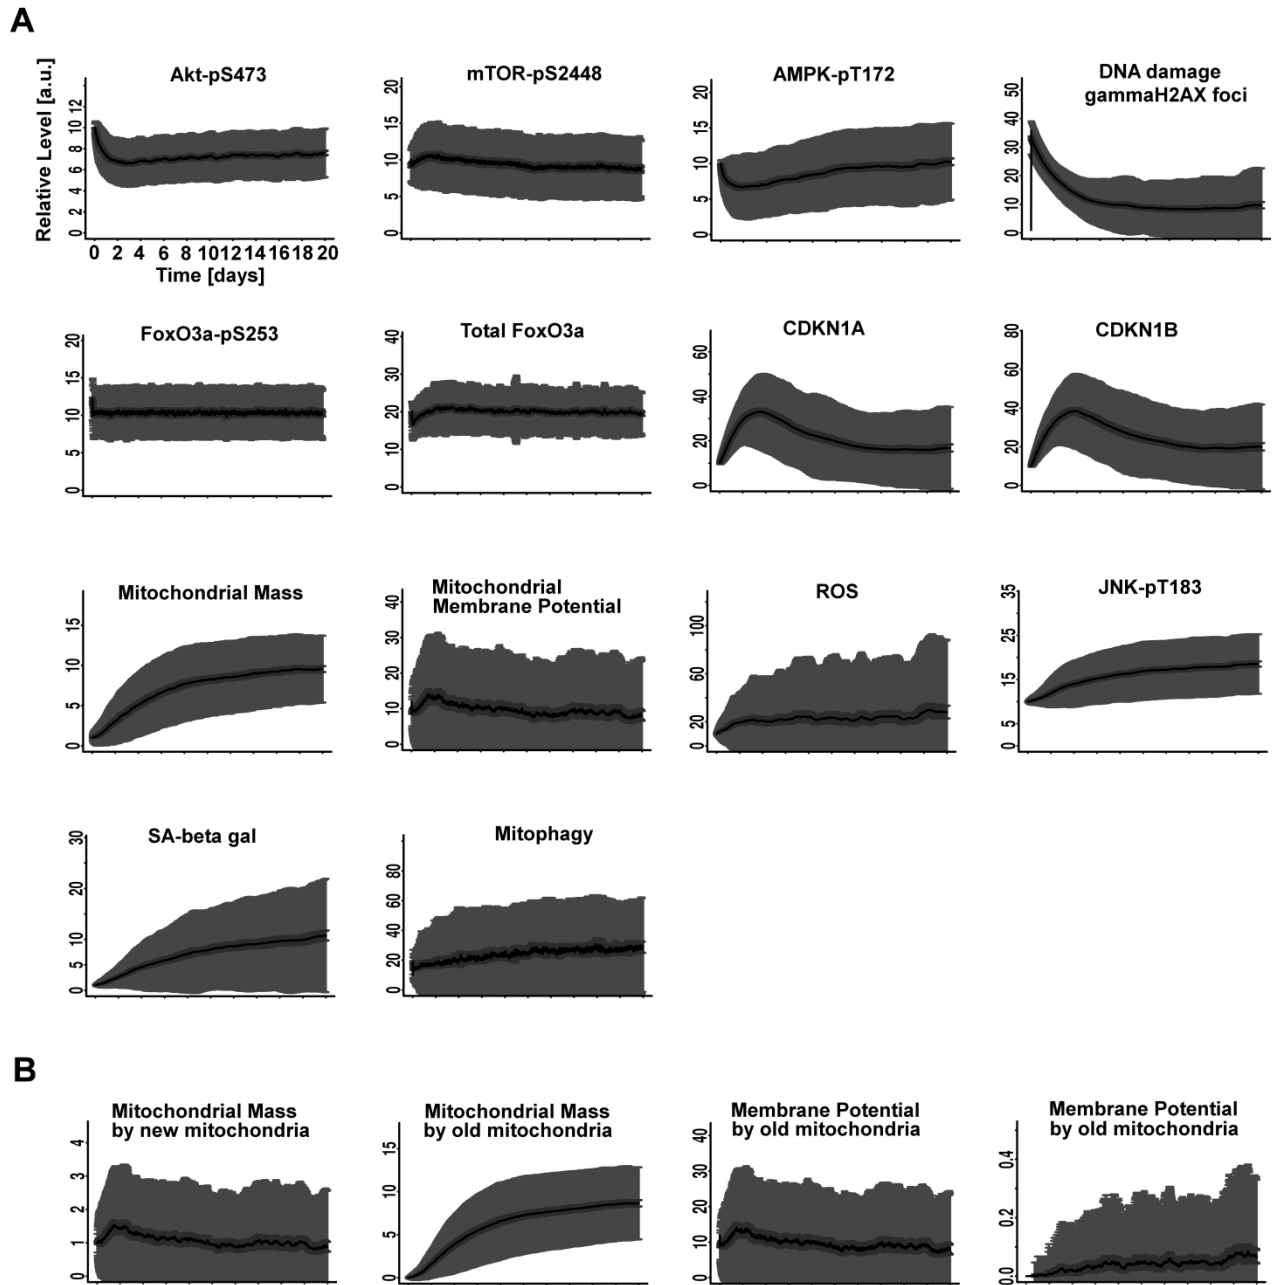

**Figure S24. Model stochastic simulation showed increase stochasticity over time.**

Model stochastic simulations up to 20 days graphically showed increased stochasticity for the oxidative stress/DNA damage signalling species. Moderate increased variance was also detected for the species Mitophagy and the species representing mitochondrial mass and membrane potential. Number of stochastic runs: 500; black line indicates the means, dark grey area indicates 95% confidence interval of the mean and grey area indicates a standard deviation. (A) Species associated to *in vitro* data (observable variables). (B) Mitochondrial internal states (derived variables).
