# Supplementary material for: Dynamic Modelling of Pathways to Cellular Senescence Reveals Strategies for Targeted Interventions
Source: PLOS journal article supplement (doi:10.1371/journal.pcbi.1003728), 2014-08-28
Supplement: S25 (10.1371/journal.pcbi.1003728.s025) [file journal.pcbi.1003728.s025]

301 Moved Permanently

# Moved Permanently

The document has moved here.

---

Apache Server at www.ploscompbiol.org Port 80
